# Supplementary material for: Transcriptional programming in a Bacteroides consortium
Source: PubMed Central journal article supplement (PMC9259675; doi:10.1038/s41467-022-31614-8), 2022-07-06
Supplement: 41467_2022_31614_MOESM1_ESM.pdf [file 41467_2022_31614_MOESM1_ESM.pdf]

## Supplementary Information

### Transcriptional Programming in a *Bacteroides* Consortium

Brian D. Huang<sup>1</sup>, Thomas M. Groseclose<sup>1</sup>, and Corey J. Wilson<sup>1†</sup>

<sup>1</sup>Georgia Institute of Technology, School of Chemical & Biomolecular Engineering

<sup>†</sup>To whom correspondence should be addressed: Corey J. Wilson, Georgia Institute of Technology, School of Chemical & Biomolecular Engineering, 311 Ferst Drive, Atlanta, GA 30332-0100. Telephone: 404-385-5397; E-Mail: corey.wilson@chbe.gatech.edu

### TABLE OF CONTENTS

**Supplementary Note 1**

**Supplementary Note 2**

**Supplementary Note 3**

**Supplementary Note 4**

**Supplementary Note 5**

**Supplementary Note 6**

**Figure S1:** Components of modular transcription factors used for transcriptional programming

**Figure S2:** Regulatory performance of transcription factors in *Bacteroides* species

**Figure S3:** Demonstration of orthogonality between DNA-binding domains and synthetic operators

**Figure S4:** Transcription factor sensitivity and OD-CFU comparison

**Figure S5:** Additional single-promoter logic gates constructed in *B. thetaiotaomicron*

**Figure S6:** A complete set of 16 logic gates and consortium transcriptional programming charts

**Figure S7:** Circuit compression of NIMPLY and IMPLY gates

**Figure S8:** Direct comparison of compressed circuits with Cello programming

**Figure S9:** Demonstration of SusC knockdown in *B. thetaiotaomicron*

**Figure S10:** Maps of plasmids constructed in this study

**Table S1:** Plasmids constructed in this work

**Table S2:** Genetic parts used in this work

**Supplemental References**

**Supplementary Note 1: Intelligent biotic system – definition.** We define an intelligent biotic system as one or more chassis cells capable of (i) decision-making, (ii) coupled memory development, (iii) and communication between chassis cells and/or the host.

**Supplementary Note 2: Low performing transcription factors in *B. thetaiotaomicron* – Justification and alternate design.** Most of the transcription factors displayed inadequate fold-changes when regulating promoters with an operator at the core or proximal position alone. We generally observed weak repression evidenced by high basal expression levels when the transcription factor was bound to DNA. We posited that we could improve the performance of a given logical operation *via* increasing the apparent affinity of the transcription factor by doubling the number of DNA binding sites by way of tandem operators. The general design of the in-tandem operator-promoter was composed of two DNA operators, one intercalated between the -33 and -7 hexamer and the other proximal to the TSS (see **Supplementary Figs. 1-2**). In principle, this design maintains the ability to concurrently direct the binding of one or more cognate transcription factors while preserving orthogonal DNA binding. NOTE: The general form of this genetic architecture has been designated as a series-parallel (SE-PA) operator function in our previous reports<sup>1,2</sup>.

**Supplemental Note 3: Transcriptional programming and construction of feedforward gates.** The development of a complete set of 16 logical operations *via* transcriptional programming is predicated on a definitive bottom-up combinational rule set. Specifically, single-input single-output operations (BUFFER and NOT) represent the fundamental binaries, that can be systematically combined to create all proper two-input single-output operations (AND, NOR, A NIMPLY B, B NIMPLY A, OR, NAND, A IMPLY B, B IMPLY A, XOR, and XNOR). Rational construction of feedforward gates was informed by the performances of the individual transcription factors (see **Supplementary Fig. 2**). The P<sub>O1</sub> and P<sub>tta</sub> promoters were chosen for the first layer due to their higher maximum output when compared to the other inducible promoters developed. This was done to ensure a saturating amount of transcription factor would be produced to act on the final output promoter. The P<sub>tig</sub> promoter was chosen as the final output promoter given its high performance (minimal “leaky” expression) when controlled by any of the four X<sub>HQN</sub> transcription factors (X = I<sup>+</sup>, I<sup>A</sup>, R<sup>+</sup> or R<sup>A</sup>).

**Supplemental Note 4: Circuit compression and factors beyond the inducible promoters.** We define circuit compression as a reduction in the number of inducible promoters between any two genetic circuits with comparable operation or function. We note that other factor such as the number of constitutive promoters that are required to operate the circuit are equivalent (or fewer) between said genetic circuits. The Cello circuits discussed in this study are constructed *via* inversion<sup>3</sup> which will utilize equivalent numbers of constitutive promoters relative to transcriptional programming, or by way of the concurrent expression of dCas9<sup>4</sup>, which will utilize an additional constitutive promoter relative to transcriptional programming (T-Pro). Accordingly, given that the number of constitutive promoters used in transcriptional programming will be equal or less than synonymous Cello circuits, the number of constitutive promoters was not factored in to the accounting for compression – although in such cases where this becomes significant constitutive promoters can be included.

We posit that given two synonymous circuits (*e.g.*, XOR – Cello vs. XOR – T-Pro, see **Fig. 3g**) the compressed circuit in which promoter strengths and RBS strengths on average (*i.e.*, translation and transcription) are *on par* between inducible promoters, the compressed circuit will utilize fewer cellular resources. To test this assertion would require an assessment of growth rates, ribosome profiling, and RNA-seq analysis – in addition to using approximately equivalent production machinery, *i.e.*, promoter strength and RBS strength, and perhaps normalizing protein lifetimes – which is beyond the scope of the current study.

**Supplemental Note 5: Cello Gates.** Cello circuit design<sup>3</sup> leverages tandem promoters to create OR and NOR gates that can be connected in a modular fashion. The OR gate was developed by placing two distinct, inducible promoters upstream of a sequence of interest such that induction of either or both promoters resulted in production of the downstream target<sup>5</sup> (see **Supplementary Fig. 8g**). The NOR gate was achieved

by inverting the OR gate and adding a second regulated output promoter (see **Supplementary Fig. 8d**). Specifically, the output of the OR gate is a repressor that acts on a second regulated promoter, controlling production of the final output. The tandem promoter setup allows for the construction of a 2-promoter OR gate rather than a 4-promoter OR gate which would be achieved using a pure layering approach (see **Supplementary Fig. 8g**). Additionally, the resulting NOR gate uses the same number of promoters (3) as would be required from a layering approach (see **Supplementary Fig. 8d**). The use of tandem promoters results in several technical challenges – evident from the general architecture. Namely, unequal output levels may be observed for an OR gate if the tandem promoters affect one another's activity<sup>5</sup>. Nielsen and coworkers describe one such phenomenon as “roadblocking”, where a downstream promoter prevents the upstream promoter from transcribing the target sequence<sup>3</sup>. Accordingly, roadblocking limits the number of regulated promoters that can be used in a tandem fashion, adding an additional constraint to Cello-designed circuits.

**Supplemental Note 6: Dynamics of repeated addition and concentration dependence.** As demonstrated in this study, biological signal processing can be achieved by way of allosteric transcription factors (native and engineered). For example, in regulatory systems that utilize the lactose repressor, an input signal results in the induction of the transcription factor and objectively switches gene expression from an OFF-state to an ON-state. In the given biological system to revert the gene expression back to the OFF-state requires the aggressive dilution of the input signal which can take one or more days to achieve in a typical biotic system. Kinetic studies using our engineered BANDPASS and BANDSTOP transcription factors have shown that our collection of signal processing filters can switch between states of gene expression within a few minutes (opposed to days)<sup>6</sup>. We posit that given that  $I^+_{YQR}$ ,  $R^+_{YQR}$ ,  $I^A_{YQR}$ , and  $R^A_{YQR}$  are predicated on the same topology and basic functional mechanism our repeated addition programs will have similar dynamic features. In addition, the maintenance of an induced ON-state or OFF-state will require ligand concentrations of  $\sim 1\text{mM}$  or higher. Noting that said features will be important in subsequent implementation of this methodology. Given that our collection of transcription factors are only inducible at higher ligand concentrations than would be observed in native environments, the unintended activation of said genetic circuits is mitigated, see **Supplementary Fig. 4**. In addition, we anticipate that our transcriptional programs that involve repeated addition have the capacity to rapidly transition between states based on our observations of the dynamics of systems with similar mechanistic features<sup>6</sup>.

## Supplementary Fig. 1

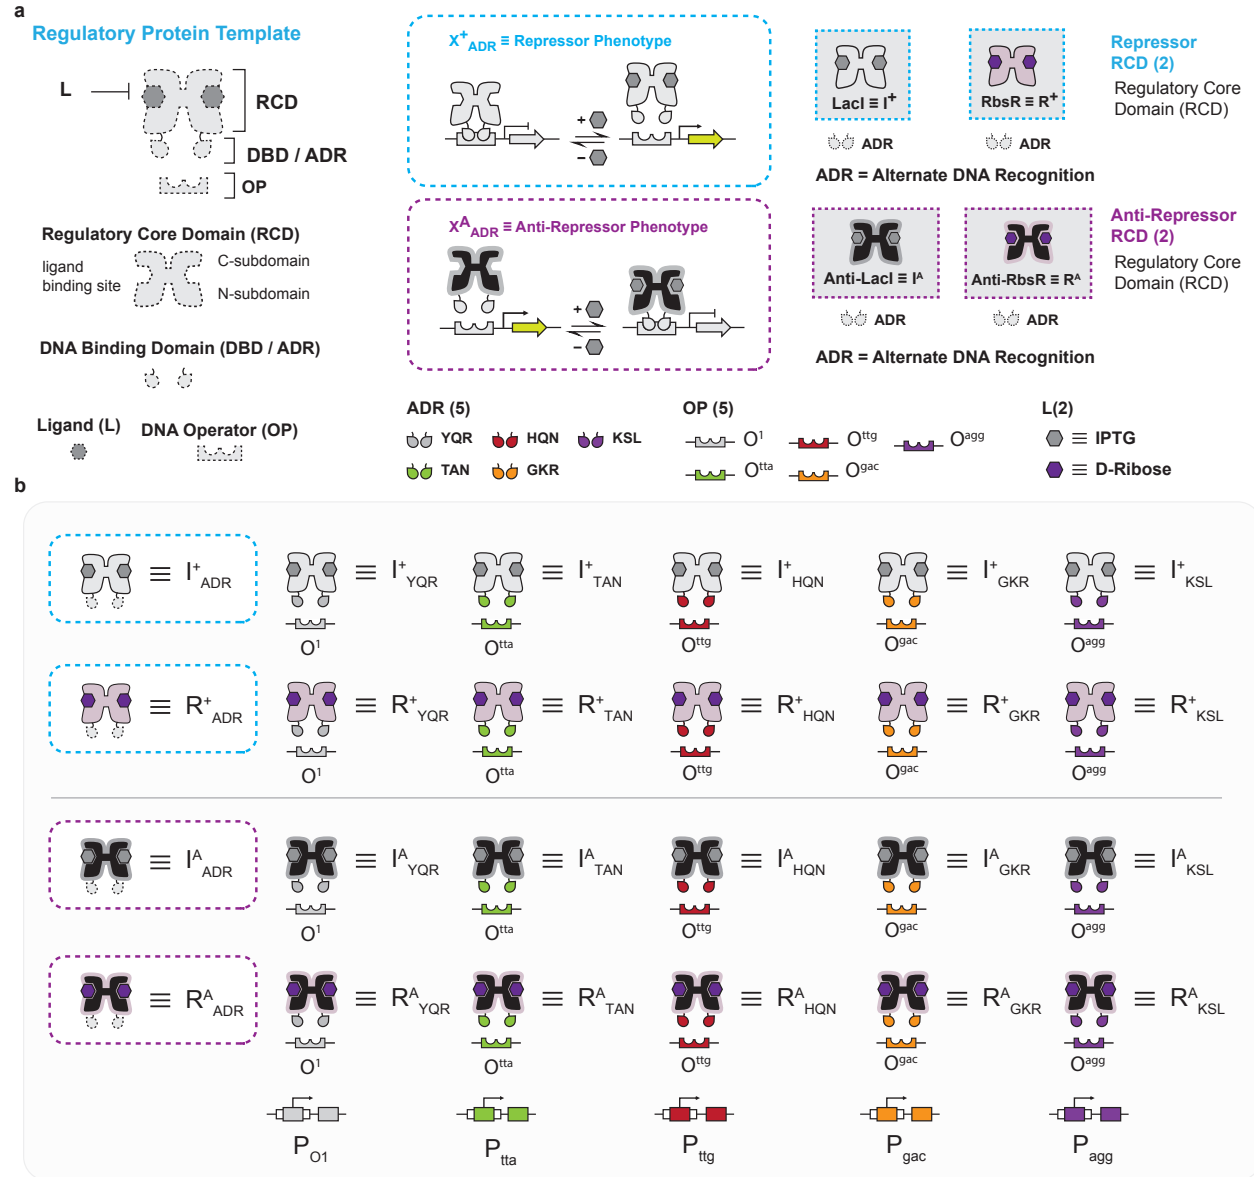

**SI Fig. 1 | Components of modular transcription factors used for transcriptional programming. a,** Summary of transcription factor architecture and nomenclature used in this study. Each transcription factor is composed of a regulatory core domain (RCD) that binds to a unique small molecule ligand and a DNA-binding domain (DBD) that binds to a specific operator (op). The cognate ligand for each RCD is shown as a colored hexagon. The repressor and anti-repressor phenotypes are illustrated in the middle. Transcription factors utilize alternate DNA recognition (ADR) which is comprised of 5 DBDs that recognize 5 unique operators which are color-coded. Each DBD is abbreviated with a three-letter code where the three letters correspond to the residues located at positions 17, 18, and 22 of the LacI DBD. Each operator is abbreviated with a three-letter code that corresponds to the critically-recognized bases of the synthetic DNA sequence. **b,** The full panel of 20 transcription factors used in this study. All 20 transcription factors are illustrated with corresponding abbreviations used in this study.

## Supplementary Fig. 2

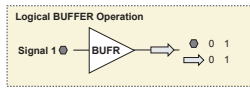

Repressor Phenotype ( $X^+$ )

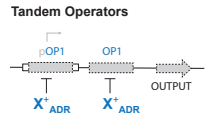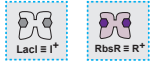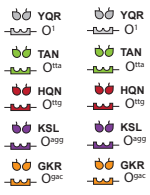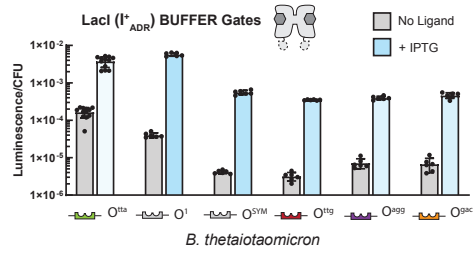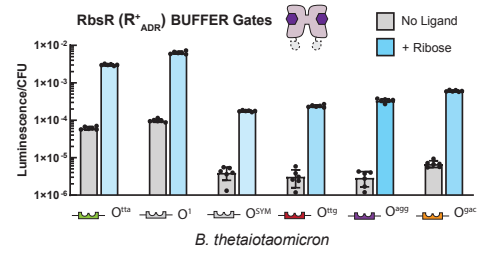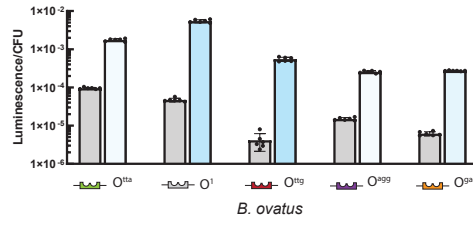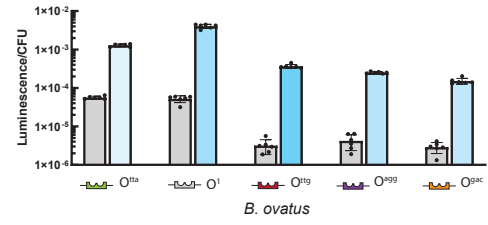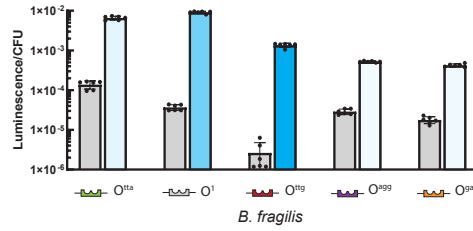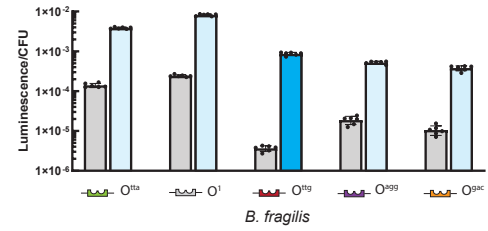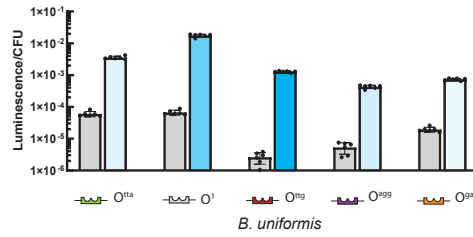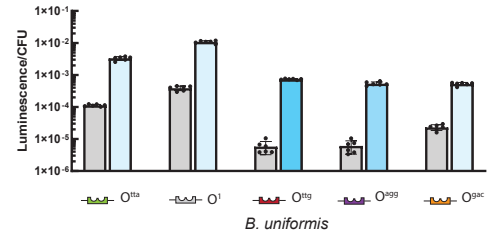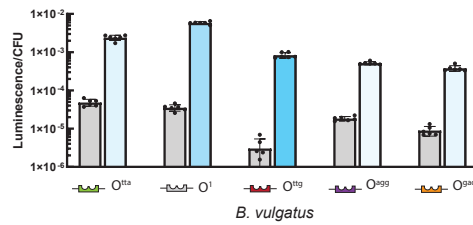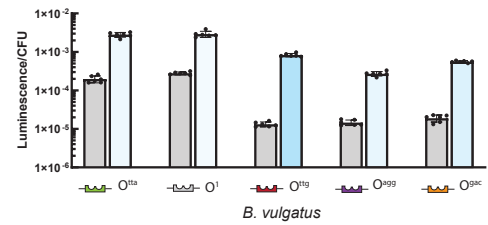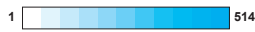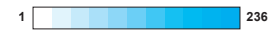

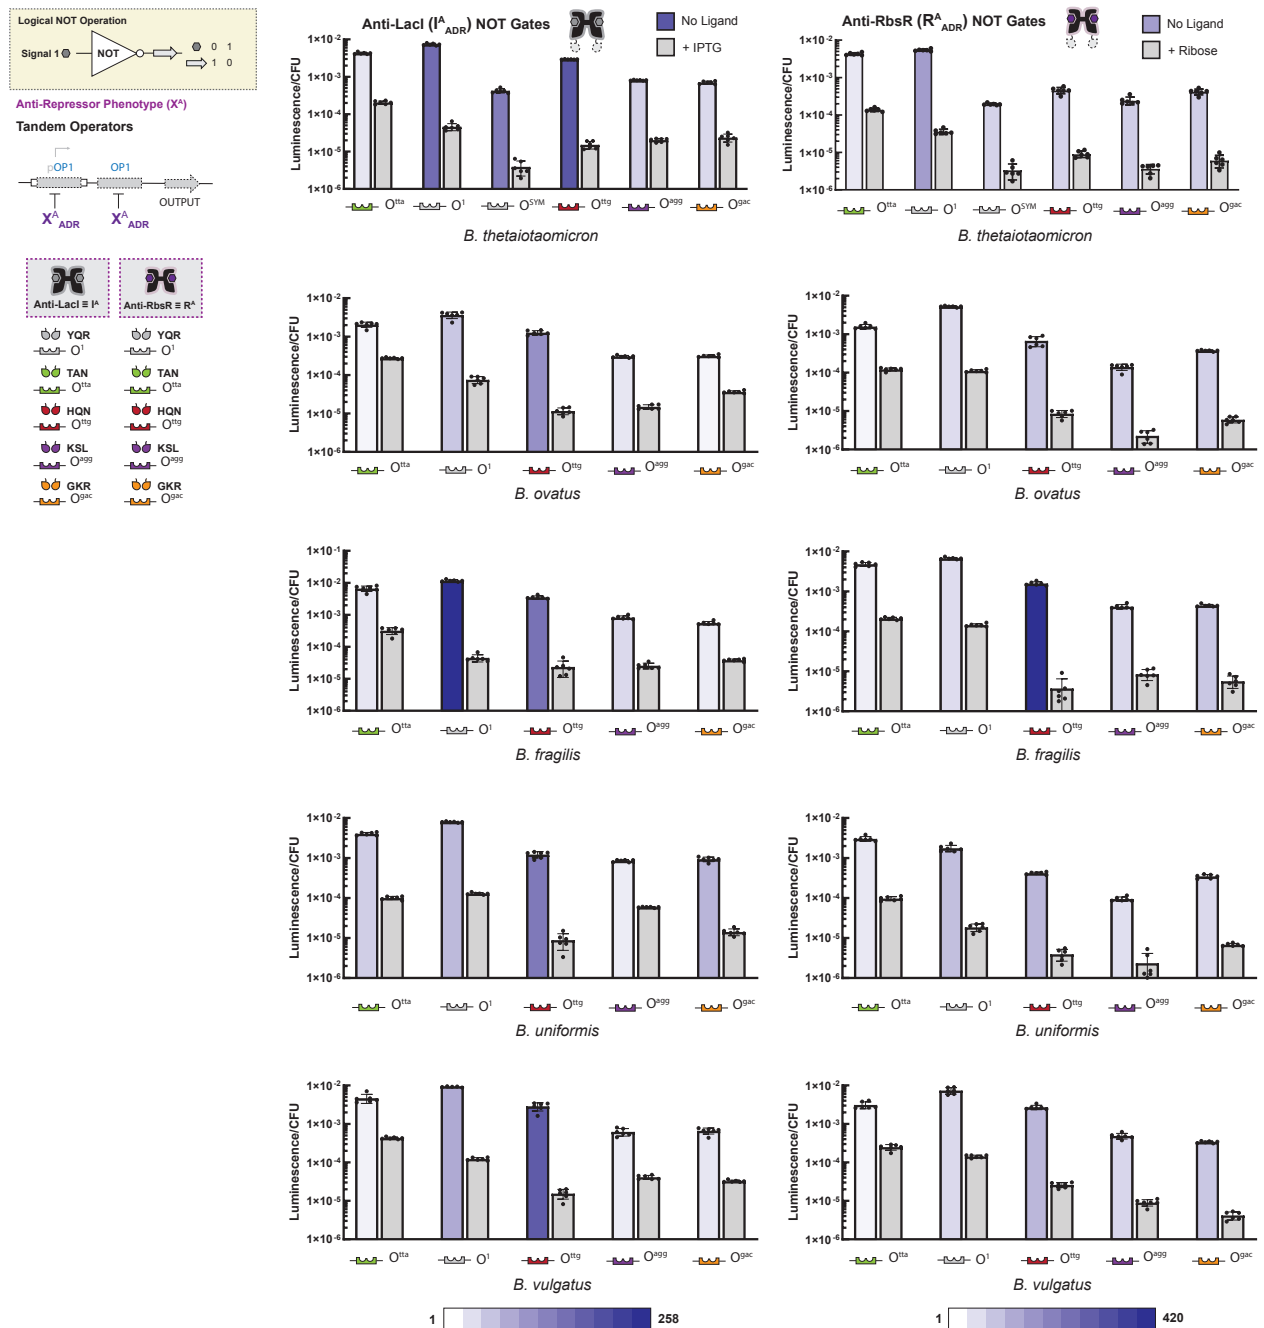

**SI Fig. 2 | Regulatory performance of transcription factors in *Bacteroides* species.** Extended data related to Fig. 1. Low and high states for every cognate TF-promoter pair are shown for the five *Bacteroides* species. Bar pairs correspond to the squares in Fig. 1 with the dynamic range being the ratio of high and low states. To direct each transcription factor, we used in-tandem operator-promoters composed of two DNA operators, one intercalated between the -33 and -7 hexamer and the other proximal to the TSS, also see **Supplementary Note 2**. Each set of transcription factors for a given logical operation could be independently directed to five separate cognate operator-promoters – i.e.,  $P_{O1}$ ,  $P_{tta}$ ,  $P_{ttg}$ ,  $P_{agg}$ , or  $P_{gac}$  – without cross interaction (also see **Supplementary Fig. 3**). Data represent the average of  $n = 6$  biological replicates. Error bars correspond to the SEM of these measurements. Induction of each promoter was determined to be statistically significant ( $P < 0.001$ ) using Welch's two-tailed unequal variances  $t$ -test. Exact P-values can be found in the Source Data file.

### Supplementary Fig. 3

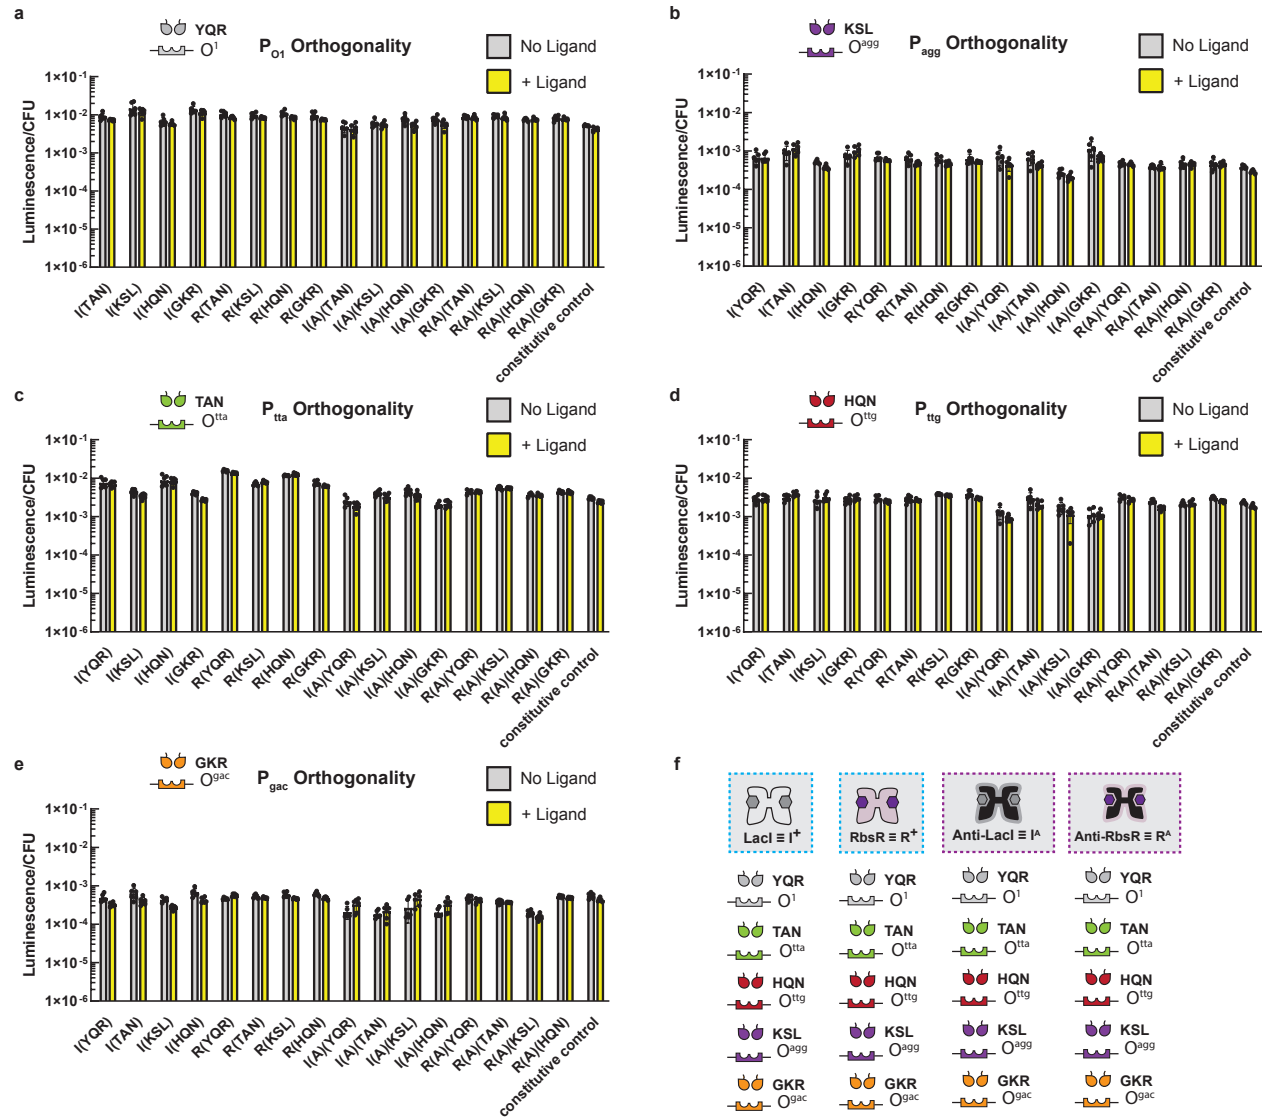

**SI Fig. 3 | Demonstration of orthogonality between DNA-binding domains and synthetic operators.**  
**a**,  $P_{O_1}$  orthogonality test. The 16 non-cognate TFs were tested for their ability to regulate  $P_{O_1}$ . Separate strains were created harboring the inducible promoter and each of the 16 non-cognate TFs. These strains were grown in the absence and presence of inducer and assayed for luciferase activity (**Methods**). The bars on the far right correspond to a strain harboring the promoter but no TF, serving as a constitutive control.  
**b**,  $P_{agg}$  orthogonality test. **c**,  $P_{tta}$  orthogonality test. **d**,  $P_{ttg}$  orthogonality test. **e**,  $P_{gac}$  orthogonality test. **f**, illustration of the 20 transcription factors used in this study. Data represent the average of  $n = 6$  biological replicates. Error bars correspond to the SEM of these measurements.

Supplementary Fig. 4

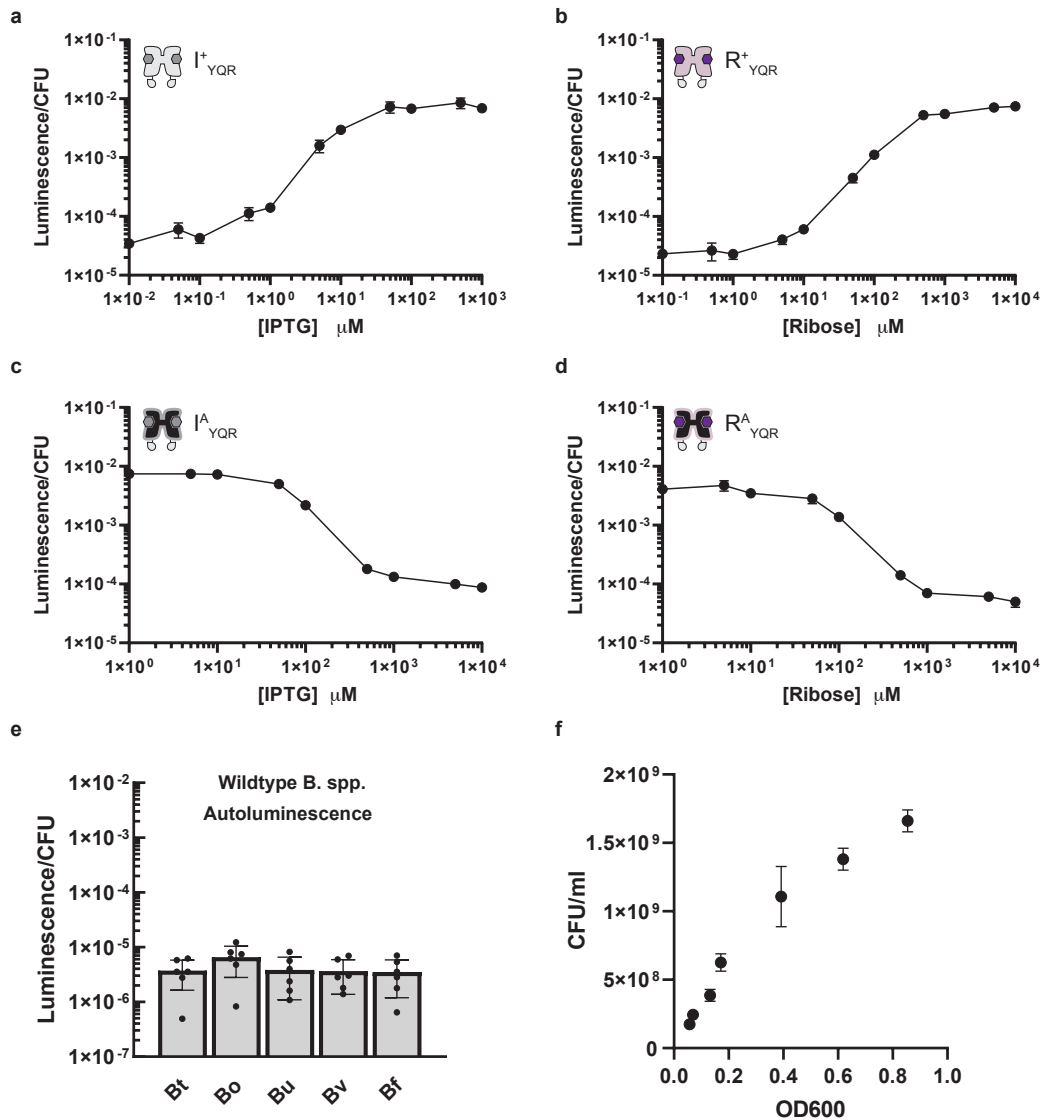

**SI Fig. 4 | Transcription factor sensitivity and OD-CFU comparison.** **a**, Dose response curve for  $I^+_{YQR}$  regulating  $P_{O1}$  in *B. thetaiotaomicron*. Cells were grown in TYG medium containing various concentrations of IPTG and assayed for luciferase activity (Methods) to assess transcription factor sensitivity. **b**, Dose response curve for  $R^+_{YQR}$  regulating  $P_{O1}$  in *B. thetaiotaomicron*. Cells were grown in TYG medium containing various concentrations of D-ribose and assayed for luciferase activity. **c**, Dose response curve for  $I^A_{YQR}$  regulating  $P_{O1}$  in *B. thetaiotaomicron*. Cells were grown in TYG medium containing various concentrations of IPTG and assayed for luciferase activity. **d**, Dose response curve for  $R^A_{YQR}$  regulating  $P_{O1}$  in *B. thetaiotaomicron*. Cells were grown in TYG medium containing various concentrations of D-ribose and assayed for luciferase activity. **e**, Autoluminescence of wildtype *Bacteroides*. Each species was grown in TYG medium and assayed for luminescence (Methods). **f**, OD-CFU curve. An example plot of OD600 of wildtype *B. thetaiotaomicron* grown in TYG medium converted to colony forming units (CFU). Cultures were grown for 16 hours with samples taken at regular intervals. Samples were serially diluted and plated on BHI agar to determine CFU. For luciferase assays, data represent the average of  $n = 6$  biological replicates. Error bars correspond to the SEM of these measurements. For OD-CFU curves, data represent the average of  $n = 3$  biological replicates. Error bars correspond to the SEM of these measurements.



## Supplementary Fig. 5

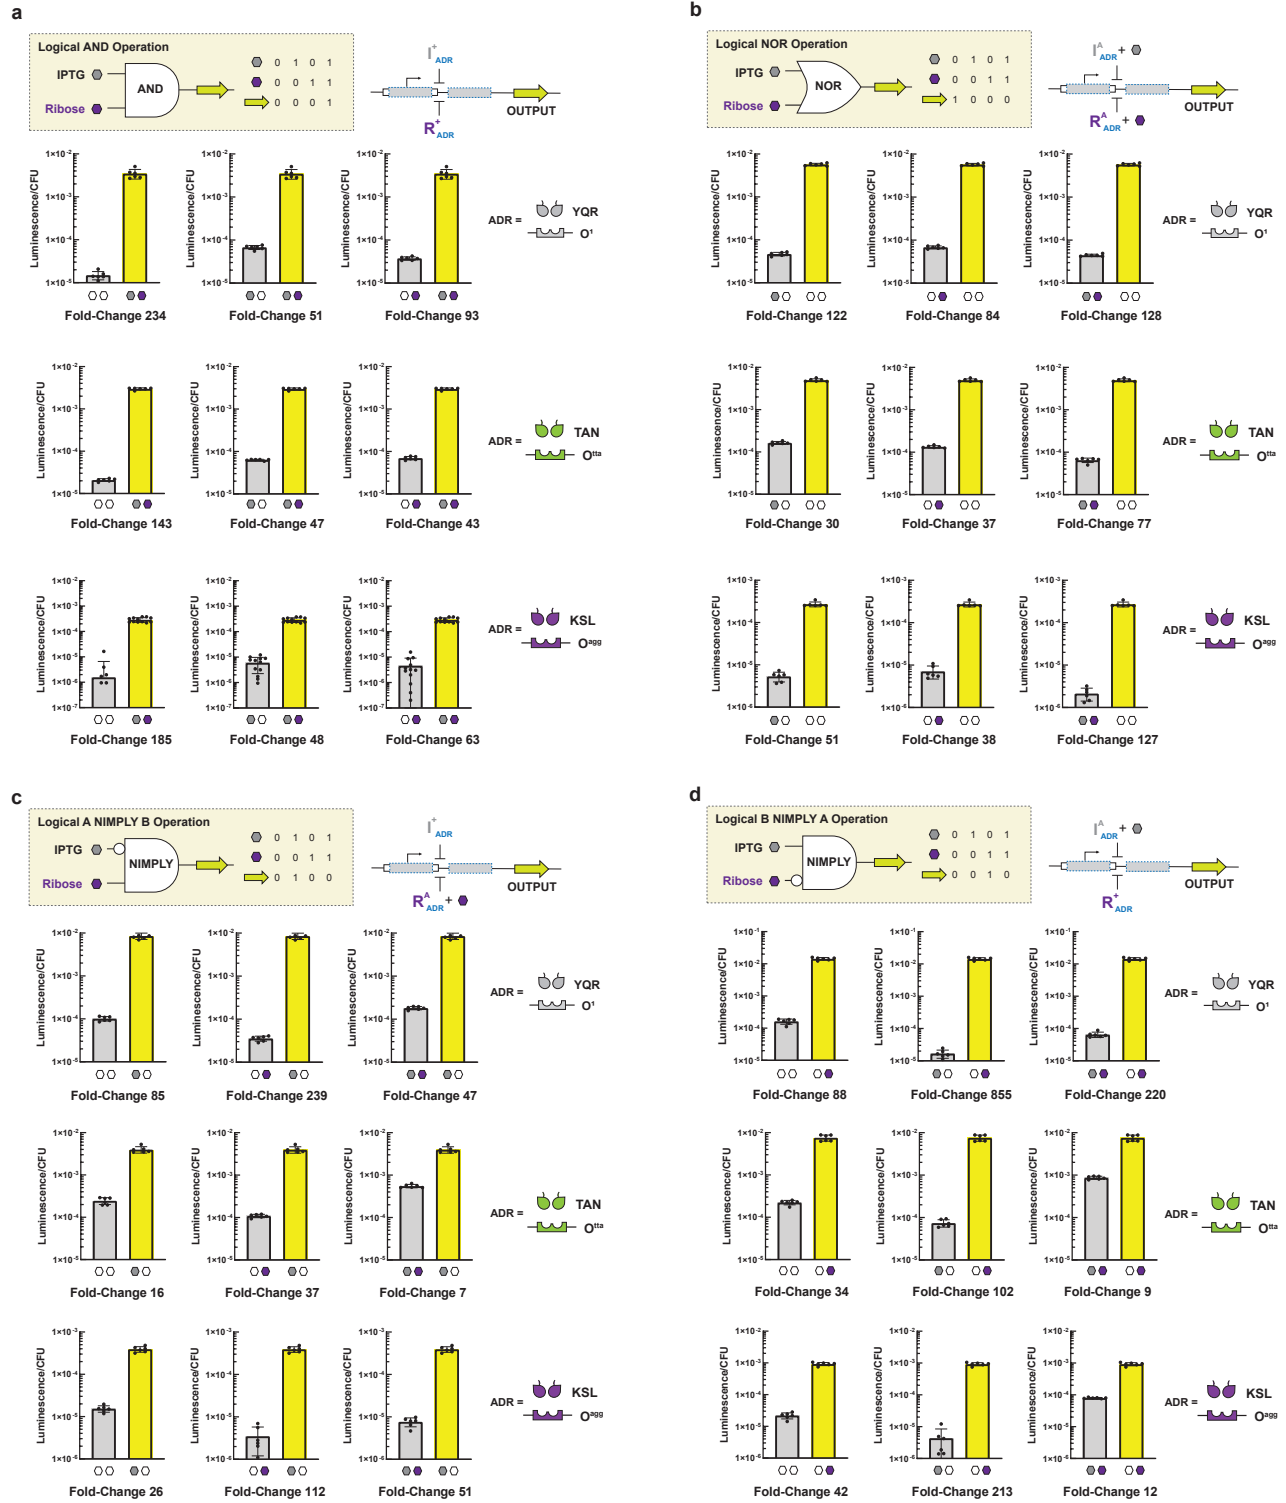

**SI Fig. 5 | Additional single-promoter logic gates constructed in *B. thetaiotaomicron*.** a, Additional AND gates created with different promoters. Each ligand condition is compared to the ON state with the corresponding fold-change in luciferase activity shown below. Cultures were assayed as described in Fig.

2. The ADR of the transcription factors used in each circuit are shown to the right of each row. **b**, Additional NOR gates created with different promoters. Each ligand condition is compared to the ON state with the corresponding fold-change in luciferase activity shown below. **c**, Additional A NIMPLY B gates created with different promoters. Each ligand condition is compared to the ON state with the corresponding fold-change in luciferase activity shown below. **d**, Additional B NIMPLY A gates created with different promoters. Each ligand condition is compared to the ON state with the corresponding fold-change in luciferase activity shown below. Data represent the average of  $n = 6$  biological replicates. Error bars correspond to the SEM of these measurements.

Supplementary Fig. 6

**a**

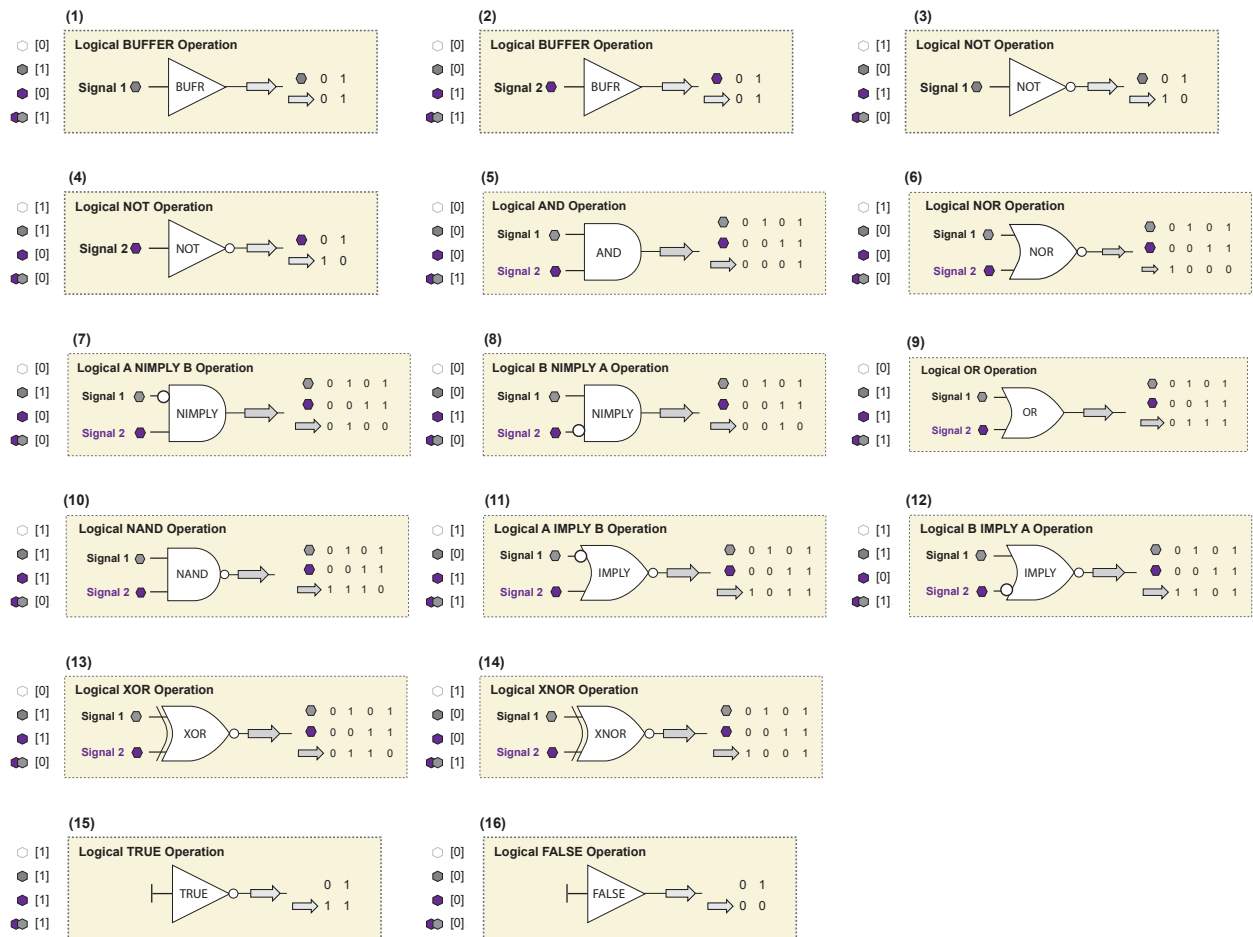

b

Gain-of-Function Consortium Transcriptional Programming Chart

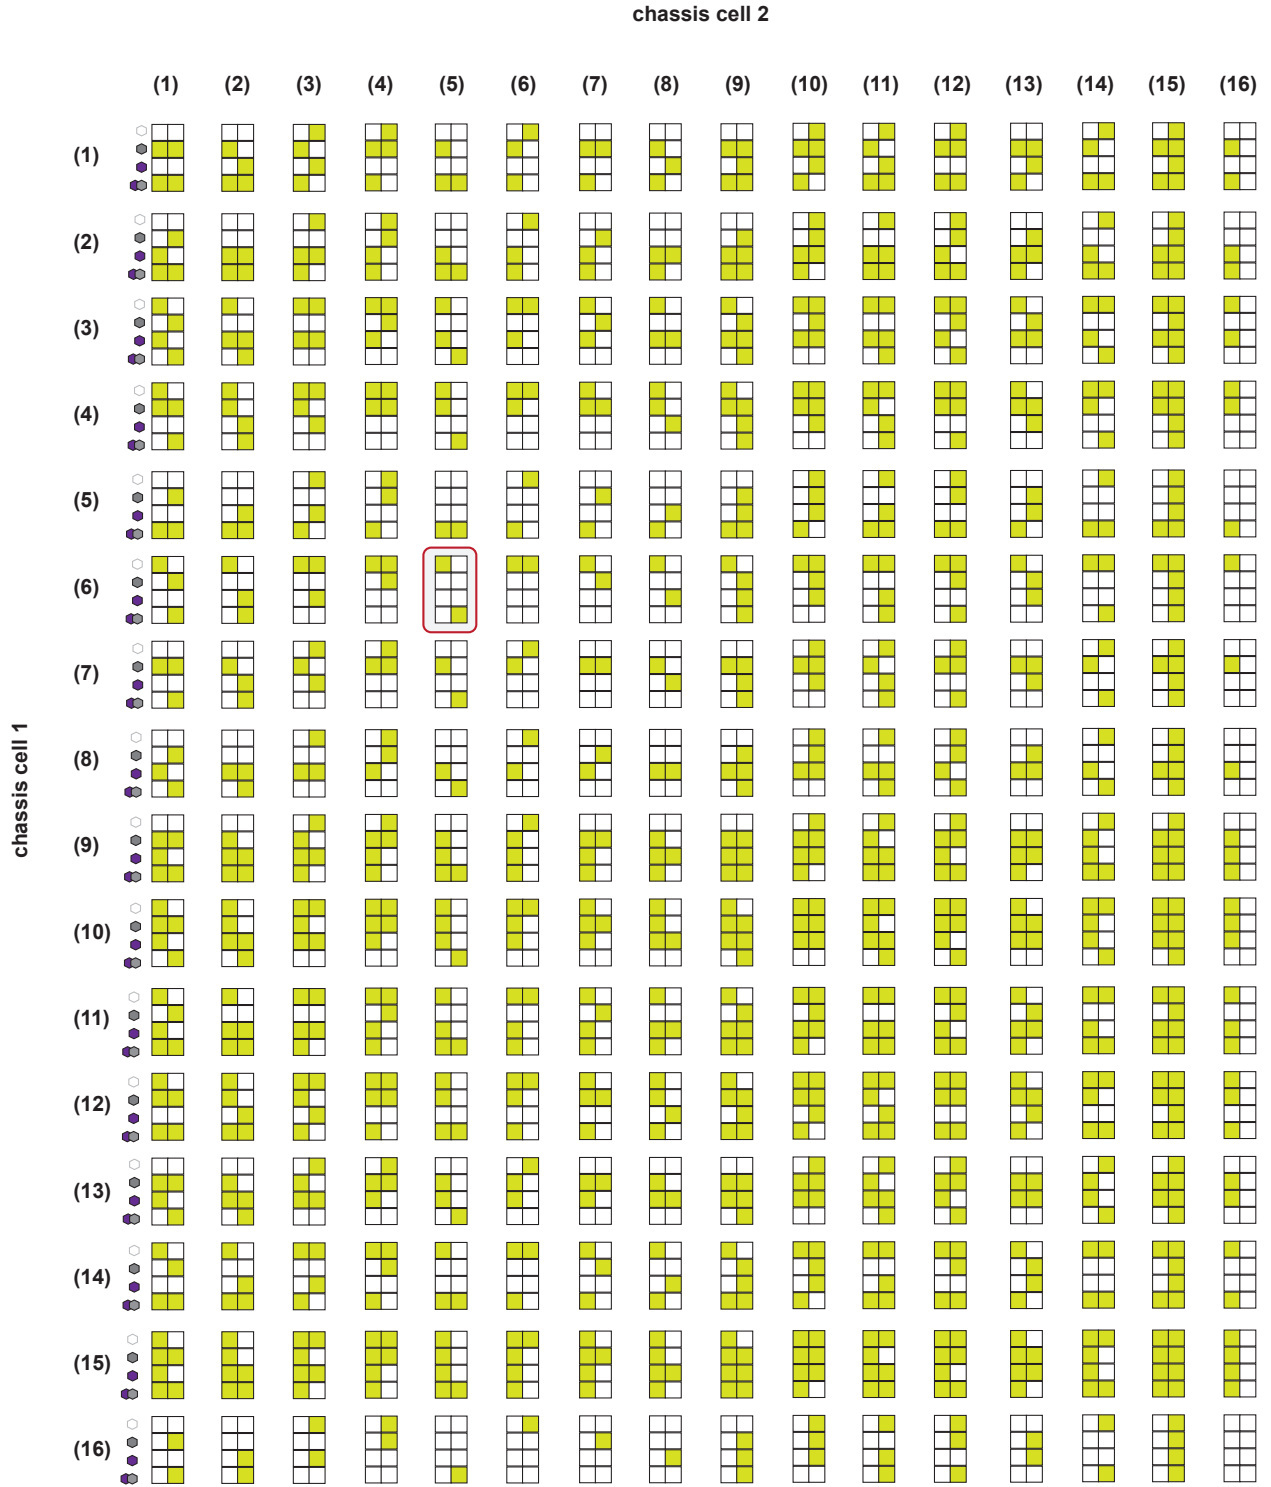

2 chassis cells =  $16^2$  (256)

3 chassis cells =  $16^3$  (4,096)

4 chassis cells =  $16^4$  (65,536)

5 chassis cells =  $16^5$  (1,048,576)

c

### Loss-of-Function Consortium Transcriptional Programming Chart

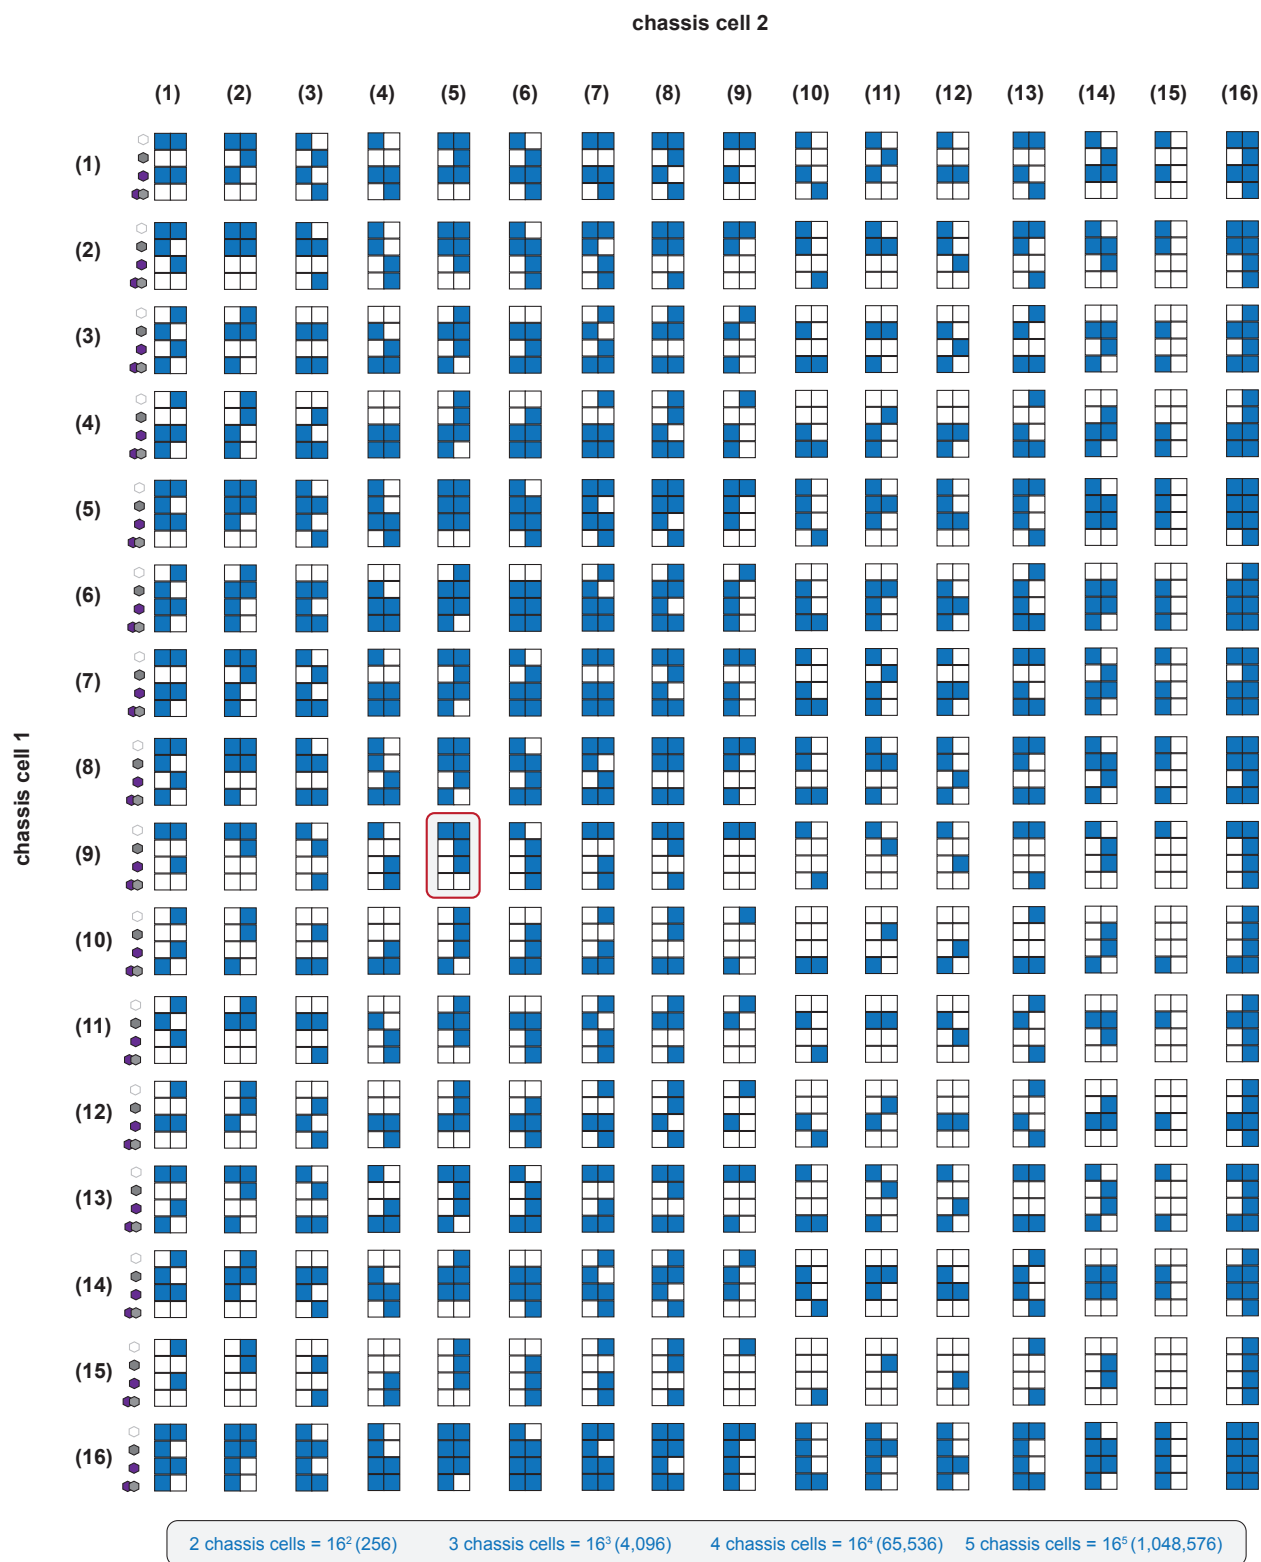

**SI Fig. 6 | A complete set of 16 logic gates and consortium transcriptional programming charts. a,** The full set of 16 two-input logic gates is presented for reference. Each gate has a corresponding truth table

shown to the right. **b**, Gain-of-function programming chart for co-culture. Each logic gate in **a** is listed vertically and horizontally to denote their potential use in chassis cell 1 or 2, respectively. The four input conditions (ligand combinations) are shown adjacent to the first column. A yellow box indicates that under the specified ligand condition gene expression will be activated in the corresponding chassis cell (chassis 1 is on the left and chassis 2 is on the right for each 2x4 grid). A white box indicates gene expression is off. Considering the co-culture experiment described in **Fig. 6**, we can designate *Bo* as chassis cell 1 and *Bt* as chassis cell 2. The red rectangle thus indicates the program used in **Fig. 6**. **c**, Loss-of-function programming chart for co-culture. This chart is analogous to **b**, but in the context of CRISPRi knockdown of a target gene. A blue box indicates a state of high gene expression while a white box indicates a knockdown state of gene expression. Considering the co-culture experiment described in **Fig. 7**, we can designate *Bo* as chassis cell 1 and *Bu* as chassis cell 2. The red rectangle indicates the program used in **Fig. 7**.

### Supplementary Fig. 7

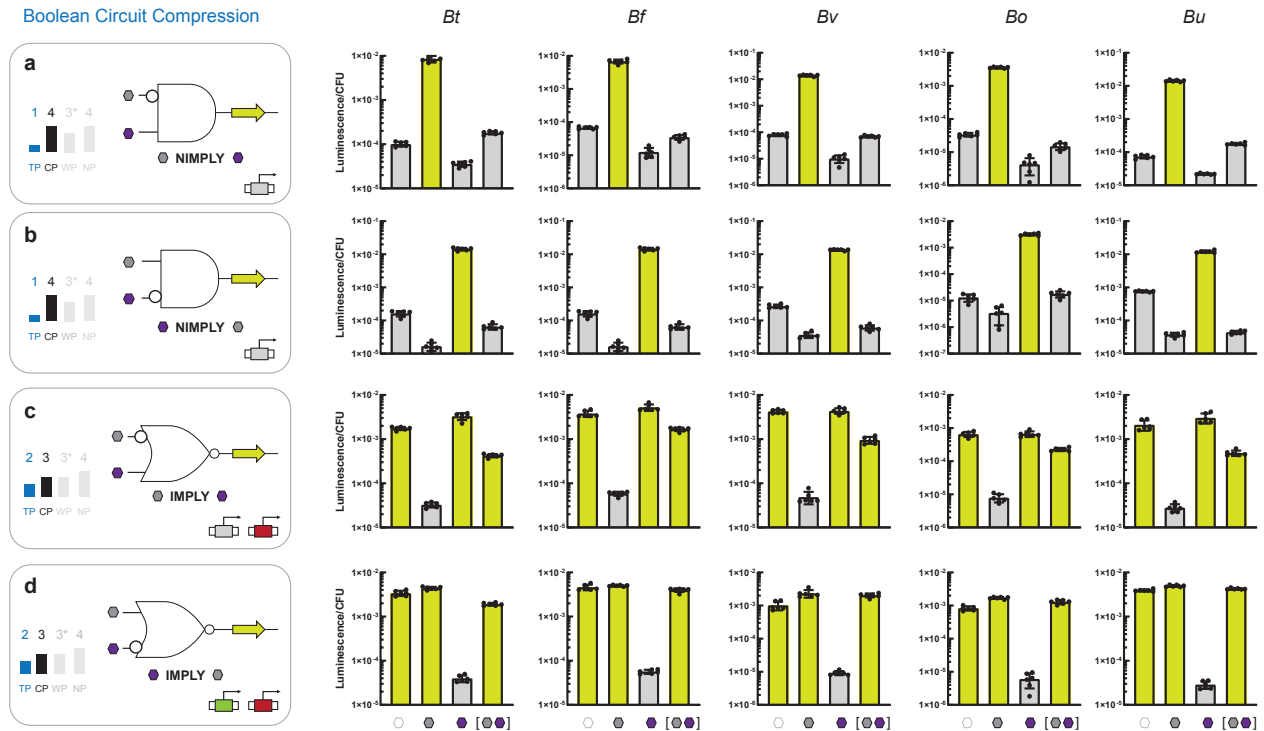

**SI Fig. 7 | Circuit compression of NIMPLY and IMPLY gates.** Related to **Fig. 3**, degree of compression (left) is presented alongside performance of logic gates in five *Bacteroides* species (right). **a-b**, NIMPLY gate compression and performance in five *Bacteroides*. See **Fig. 2** and **Supplementary Fig. 8e-f** for more details regarding gate construction. Degree of circuit compression is represented by the number of regulated promoters required to construct the logic gate. Strains harboring circuits were grown in the presence of all combinations of both inducers and assayed for luciferase activity (**Methods**). **c-d**, IMPLY gate compression and performance in five *Bacteroides*. See **Supplementary Fig. 8i-j** for details regarding gate construction. Regulated promoters used for each logic gate are shown in the bottom right corner of each left-hand box (also see **Fig. 1** for more detail). Data represent the average of  $n = 6$  biological replicates. Error bars correspond to the SEM of these measurements.

Supplementary Fig. 8 (single-layer logic gates)

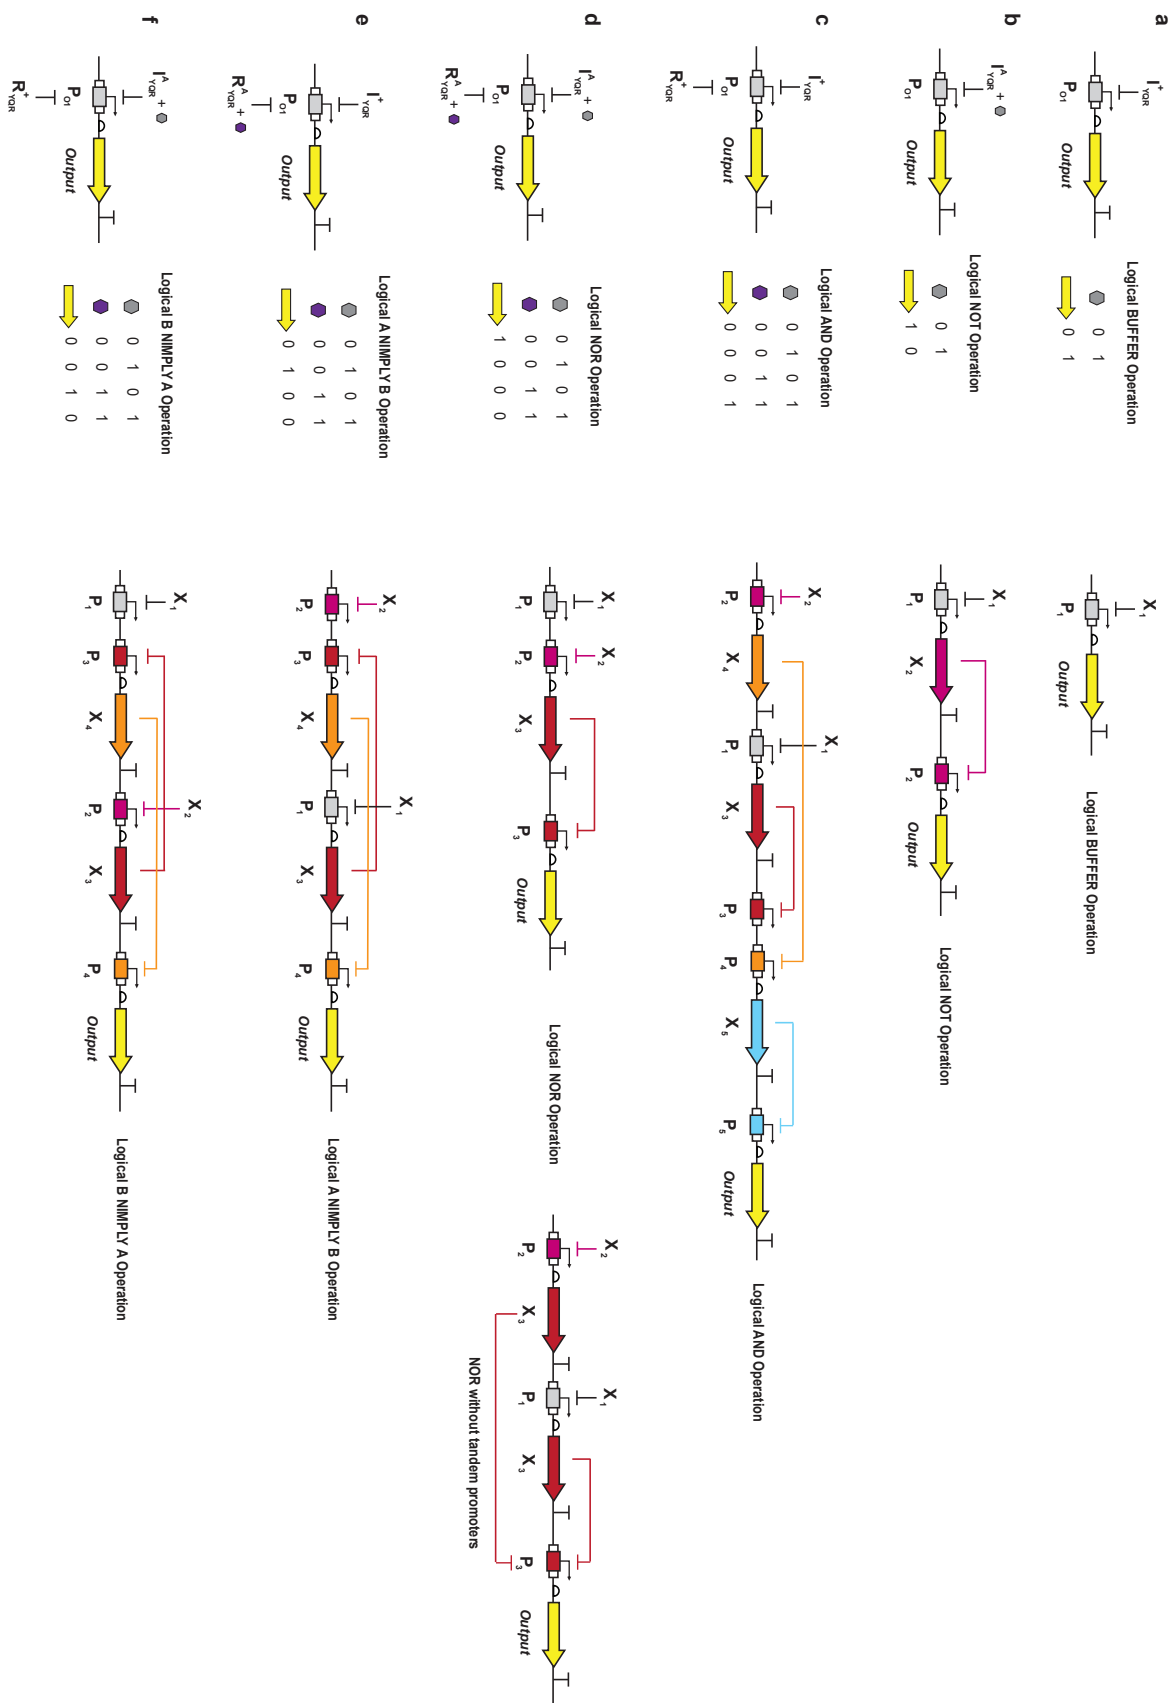

Supplementary Fig. 8 (two-layer logic gates)

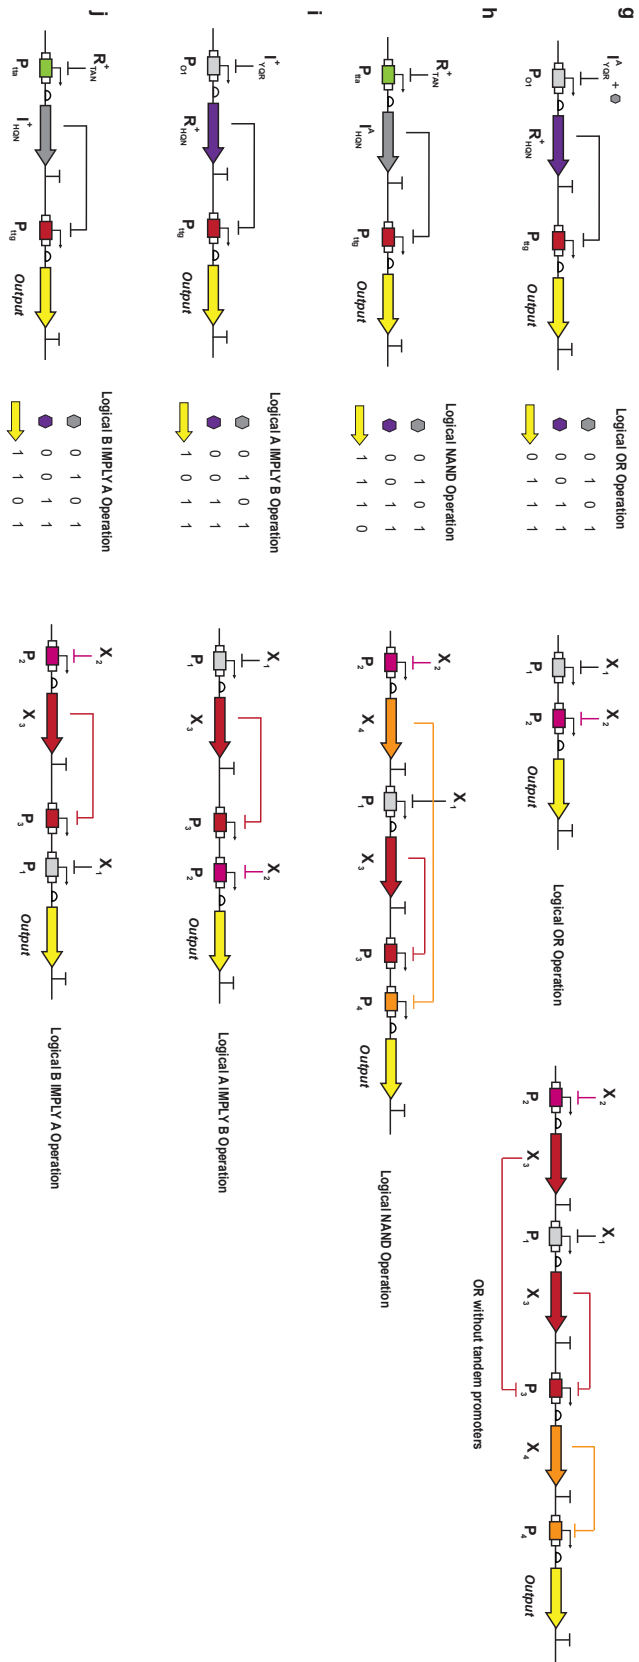

Supplementary Fig. 8 (three-layer logic gates)

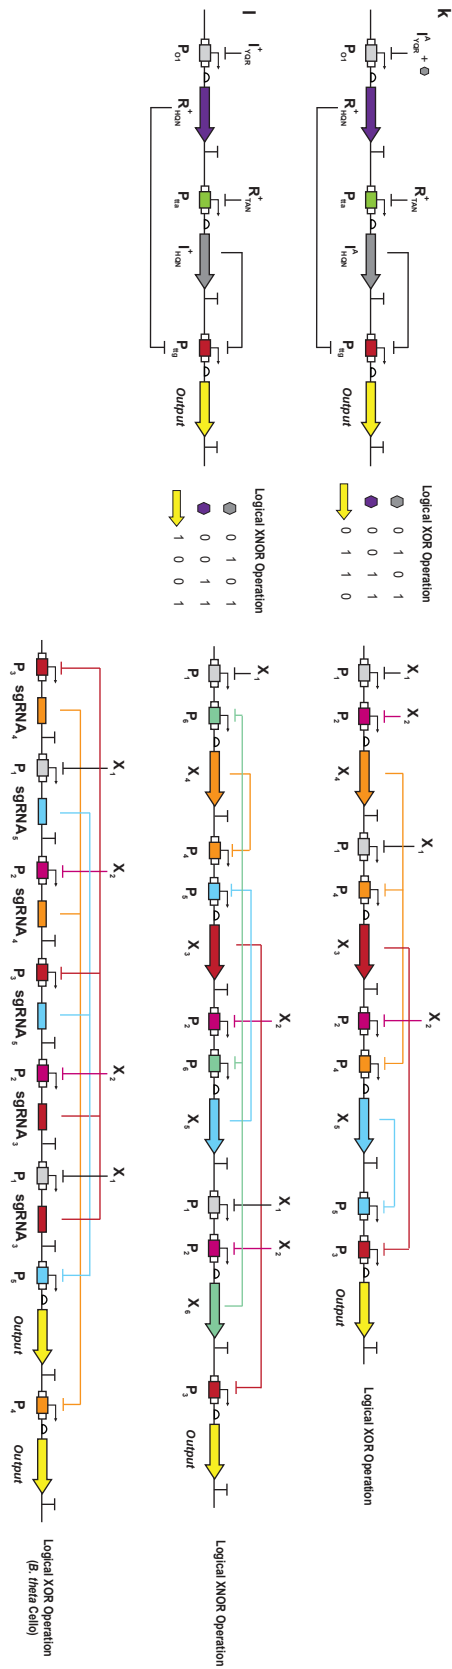



**SI Fig. 8 | Direct comparison of compressed circuits with Cello programming (3 pages).** Wiring diagrams are presented for all logic gates constructed in this study (left) as well as the equivalent logic gates reported in Nielsen *et al.*<sup>3</sup> (right). For circuits built in this study, the promoters correspond to those shown in **Fig. 1**. The binary truth table for the logic gate is shown to the right. For Cello circuits, X indicates a generic TF with the subscript indicating the cognate promoter it recognizes. Only X<sub>1</sub> and X<sub>2</sub> are used as inducible TFs, while all other TFs are used only to repress their cognate promoters. **a**, BUFFER gate. **b**, NOT gate. **c**, AND gate. **d**, NOR gate. The reported Cello NOR gate is shown (middle) along with a theoretical NOR gate constructed without tandem promoters (right). **e**, A NIMPLY B gate. **f**, B NIMPLY A gate. **g**, OR gate. The reported Cello OR gate is shown (middle) along with a theoretical OR gate constructed without tandem promoters (right). **h**, NAND gate. **i**, A IMPLY B gate. **j**, B IMPLY A gate. **k**, XOR gate. An additional apparent XOR gate reported by Taketani *et al.*<sup>4</sup> is displayed at the bottom. This circuit utilizes CRISPRi and requires a constitutively expressed dCas9 gene. X<sub>1</sub> and X<sub>2</sub> are inducible TFs that recognize P<sub>1</sub> and P<sub>2</sub>, respectively. The circuit relies on sgRNAs to repress synthetic promoters and utilizes two output genes to achieve apparent XOR phenotype. **l**, XNOR gate.

## Supplementary Fig. 9

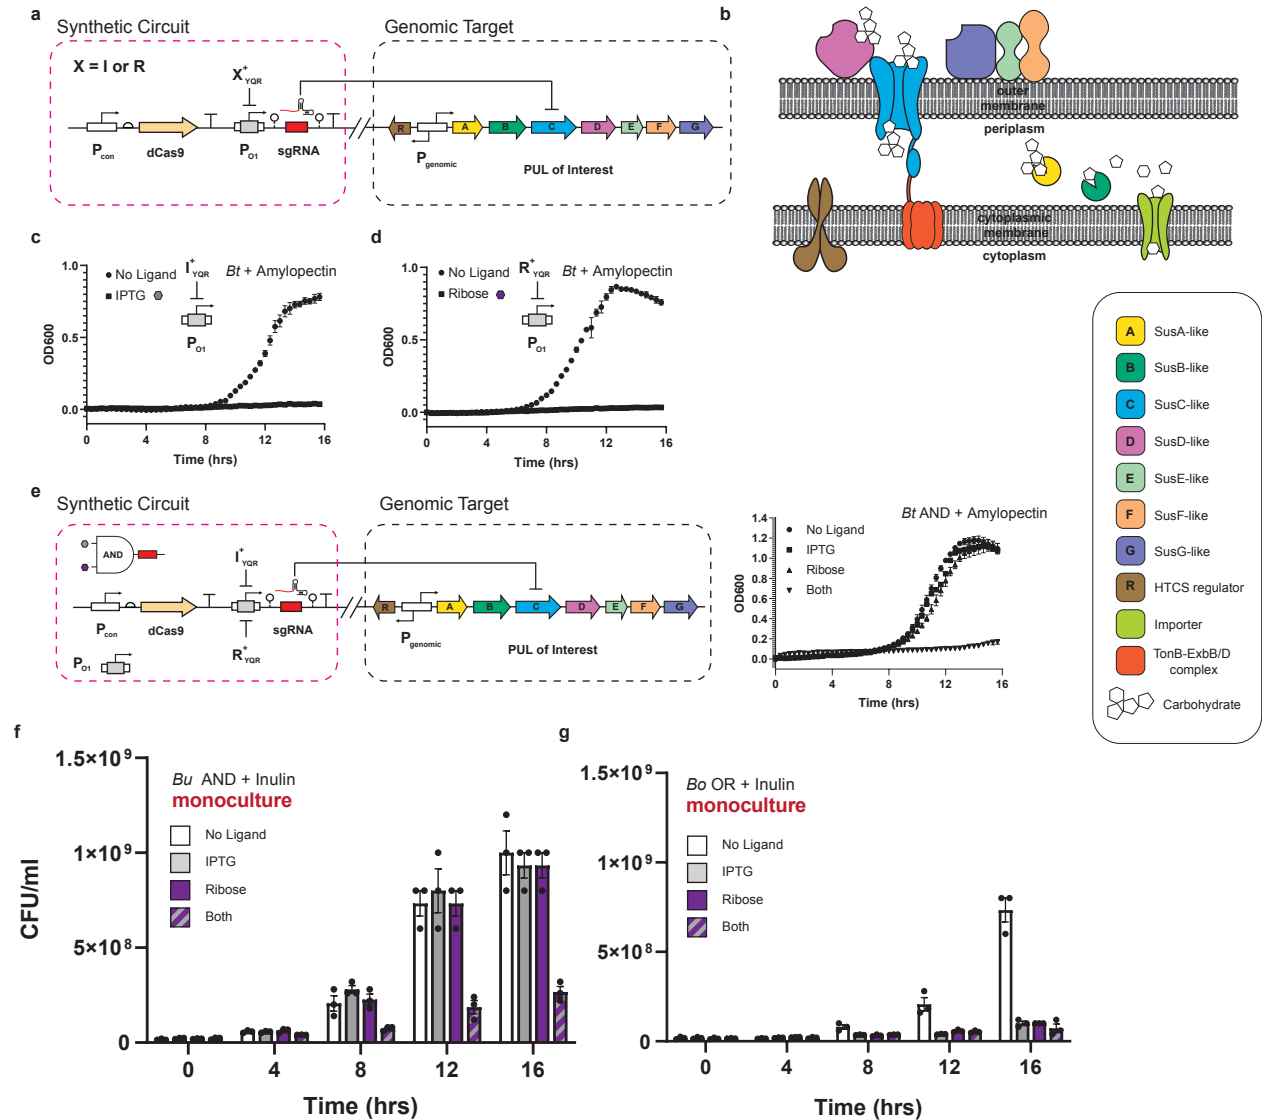

**SI Fig. 9 | Demonstration of SusC knockdown in *B. thetaiotaomicron*.** **a**, Wiring diagram of CRISPRi circuit targeting endogenous SusC-like gene. Strains were created with X<sup>+</sup><sub>YQR</sub> regulating a sgRNA specific to the *B. thetaiotaomicron* amylopectin SusC gene. **b**, Cartoon of PUL organization, highlighting the function of the SusC-like importer. **c**, Growth curves of *B. thetaiotaomicron* harboring circuit shown in **a** with I<sup>+</sup><sub>YQR</sub> as the sgRNA regulator. **d**, Growth curves of *B. thetaiotaomicron* harboring circuit shown in **a** with R<sup>+</sup><sub>YQR</sub> as the sgRNA regulator. Strains harboring CRISPRi circuits were grown in the absence and presence of inducer in minimal media containing amylopectin as the only carbon source (Methods). **e**, Wiring diagram for an AND gate controlling the sgRNA targeting *B. thetaiotaomicron* amylopectin SusC gene (left). Growth curves of *B. thetaiotaomicron* harboring this circuit when grown in amylopectin minimal media containing all combinations of both inducers (right). For OD600 growth curves, data represent the average of  $n = 3$  biological replicates. Error bars correspond to the SEM of these measurements. **f-g**, related to **Fig. 6**. The monoculture growth curve experiments presented in **Fig. 5a** and **Fig. 5c** were repeated using dilution plating to quantify culture density instead of OD600. Data represent the average of  $n = 3$  technical replicates. Error bars correspond to the SEM of these measurements. This provides a direct comparison to the co-culture data presented in **Fig. 6**.

### Supplementary Fig. 10

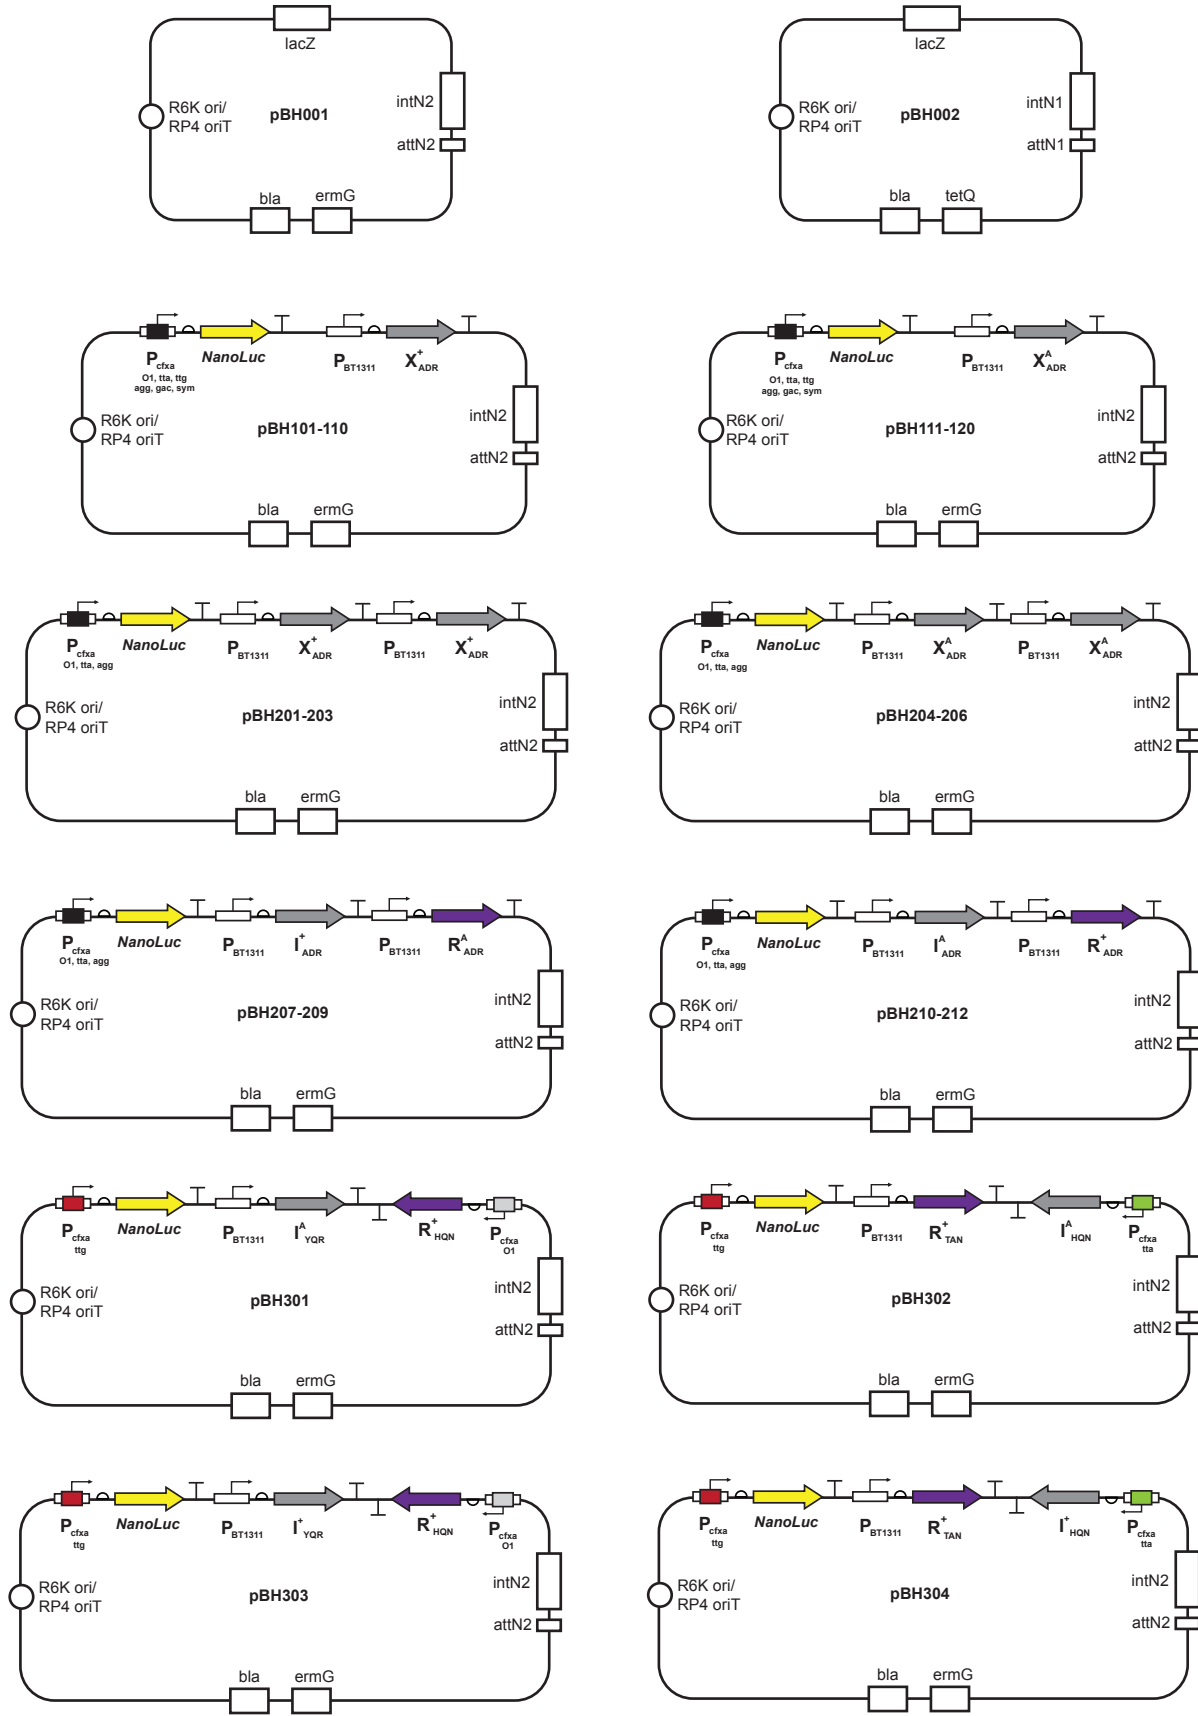

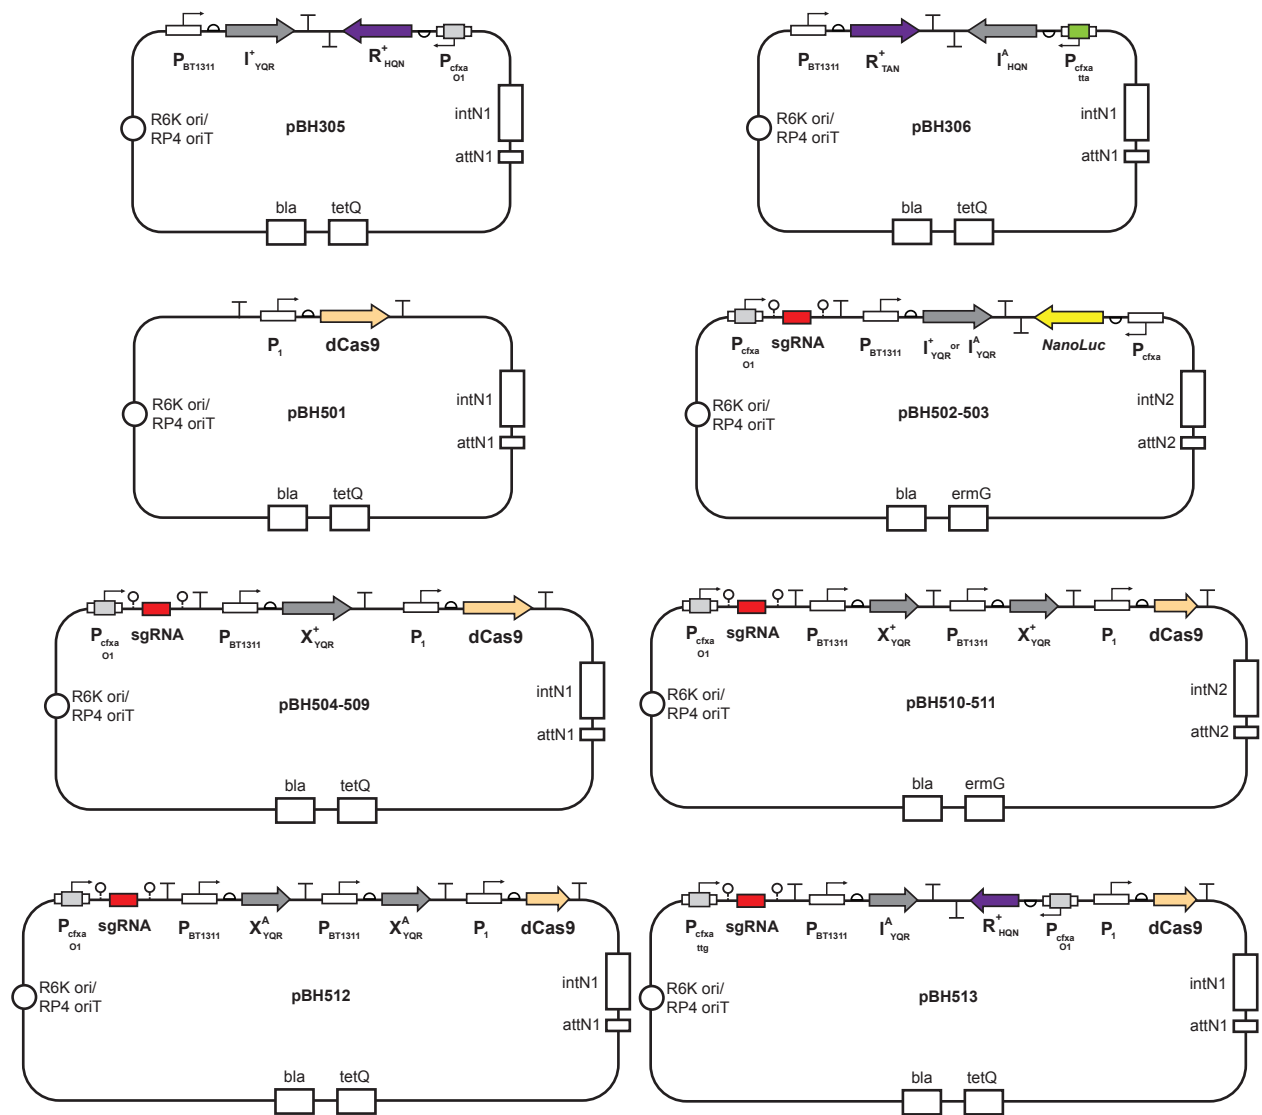

**SI Fig. 10 | Maps of plasmids constructed in this study (2 pages).** Plasmid names correspond to descriptions in SI Table 1.

**Supplementary Table 1: Plasmids constructed in this work.**

| Designation | Genetic Parts                                         | Backbone | Description              |
|-------------|-------------------------------------------------------|----------|--------------------------|
| pBH001      | intN2_ErmG_Bla_LacZ_BsmBI sites                       | NBU2     | cloning vector           |
| pBH002      | intN1_TetQ_Bla_LacZ_BsmBI sites                       | NBU1     | cloning vector           |
| pBH101      | LacI(YQR)_pCFXA_O1CP_nanoluc                          | NBU2     | BUFFER Gate<br>LacI(ADR) |
| pBH102      | LacI(TAN)_pCFXA_OttaCP_nanoluc                        | NBU2     | BUFFER Gate<br>LacI(ADR) |
| pBH103      | LacI(KSL)_pCFXA_OaggCP_nanoluc                        | NBU2     | BUFFER Gate<br>LacI(ADR) |
| pBH104      | LacI(HQN)_pCFXA_OttgCP_nanoluc                        | NBU2     | BUFFER Gate<br>LacI(ADR) |
| pBH105      | LacI(GKR)_pCFXA_OgacCP_nanoluc                        | NBU2     | BUFFER Gate<br>LacI(ADR) |
| pBH106      | RbsR(YQR)_pCFXA_O1CP_nanoluc                          | NBU2     | BUFFER Gate<br>RbsR(ADR) |
| pBH107      | RbsR(TAN)_pCFXA_OttaCP_nanoluc                        | NBU2     | BUFFER Gate<br>RbsR(ADR) |
| pBH108      | RbsR(KSL)_pCFXA_OaggCP_nanoluc                        | NBU2     | BUFFER Gate<br>RbsR(ADR) |
| pBH109      | RbsR(HQN)_pCFXA_OttgCP_nanoluc                        | NBU2     | BUFFER Gate<br>RbsR(ADR) |
| pBH110      | RbsR(GKR)_pCFXA_OgacCP_nanoluc                        | NBU2     | BUFFER Gate<br>RbsR(ADR) |
| pBH111      | IA(9)(YQR)_pCFXA_O1CP_nanoluc                         | NBU2     | NOT Gate IA(9)(ADR)      |
| pBH112      | IA(9)(TAN)_pCFXA_OttaCP_nanoluc                       | NBU2     | NOT Gate IA(9)(ADR)      |
| pBH113      | IA(9)(KSL)_pCFXA_OaggCP_nanoluc                       | NBU2     | NOT Gate IA(9)(ADR)      |
| pBH114      | IA(9)(HQN)_pCFXA_OttgCP_nanoluc                       | NBU2     | NOT Gate IA(9)(ADR)      |
| pBH115      | IA(9)(GKR)_pCFXA_OgacCP_nanoluc                       | NBU2     | NOT Gate IA(9)(ADR)      |
| pBH116      | RA(1)(YQR)_pCFXA_O1CP_nanoluc                         | NBU2     | NOT Gate RA(1)(ADR)      |
| pBH117      | RA(1)(TAN)_pCFXA_OttaCP_nanoluc                       | NBU2     | NOT Gate RA(1)(ADR)      |
| pBH118      | RA(1)(KSL)_pCFXA_OaggCP_nanoluc                       | NBU2     | NOT Gate RA(1)(ADR)      |
| pBH119      | RA(1)(HQN)_pCFXA_OttgCP_nanoluc                       | NBU2     | NOT Gate RA(1)(ADR)      |
| pBH120      | RA(1)(GKR)_pCFXA_OgacCP_nanoluc                       | NBU2     | NOT Gate RA(1)(ADR)      |
| pBH201      | LacI(YQR)_RbsR(YQR)_pCFXA_O1CP_nanoluc                | NBU2     | AND Gate                 |
| pBH202      | LacI(TAN)_RbsR(TAN)_pCFXA_OttaCP_nanoluc              | NBU2     | AND Gate                 |
| pBH203      | LacI(KSL)_RbsR(KSL)_pCFXA_OaggCP_nanoluc              | NBU2     | AND Gate                 |
| pBH204      | IA(9)(YQR)_RA(1)(YQR)_pCFXA_O1CP_nanoluc              | NBU2     | NOR Gate                 |
| pBH205      | IA(9)(TAN)_RA(1)(TAN)_pCFXA_OttaCP_nanoluc            | NBU2     | NOR Gate                 |
| pBH206      | IA(9)(KSL)_RA(1)(KSL)_pCFXA_OaggCP_nanoluc            | NBU2     | NOR Gate                 |
| pBH207      | LacI(YQR)_RA(1)(YQR)_pCFXA_O1CP_nanoluc               | NBU2     | I NIMPLY R Gate          |
| pBH208      | LacI(TAN)_RA(1)(TAN)_pCFXA_OttaCP_nanoluc             | NBU2     | I NIMPLY R Gate          |
| pBH209      | LacI(KSL)_RA(1)(KSL)_pCFXA_OaggCP_nanoluc             | NBU2     | I NIMPLY R Gate          |
| pBH210      | IA(9)(YQR)_RbsR(YQR)_pCFXA_O1CP_nanoluc               | NBU2     | R NIMPLY I Gate          |
| pBH211      | IA(9)(TAN)_RbsR(TAN)_pCFXA_OttaCP_nanoluc             | NBU2     | R NIMPLY I Gate          |
| pBH212      | IA(9)(KSL)_RbsR(KSL)_pCFXA_OaggCP_nanoluc             | NBU2     | R NIMPLY I Gate          |
| pBH301      | IA(9)(YQR)_pCFXA_O1CP_RbsR(HQN)_pCFXA_OttgCP_nanoluc  | NBU2     | OR Gate                  |
| pBH302      | RbsR(TAN)_pCFXA_ttaCP_IA(9)(HQN)_pCFXA_OttgCP_nanoluc | NBU2     | NAND Gate                |
| pBH303      | LacI(YQR)_pCFXA_O1CP_RbsR(HQN)_pCFXA_OttgCP_nanoluc   | NBU2     | I IMPLY R Gate           |

|        |                                                      |      |                                                         |
|--------|------------------------------------------------------|------|---------------------------------------------------------|
| pBH304 | RbsR(TAN)_pCFXA_ttaCP_LacI(HQN)_pCFXA_OttgCP_nanoluc | NBU2 | R IMPLY I Gate, partial XNOR gate                       |
| pBH305 | LacI(YQR)_pCFXA_O1CP_RbsR(HQN)                       | NBU1 | XNOR Gate (partial)                                     |
| pBH306 | RbsR(TAN)_pCFXA_ttaCP_IA(9)(HQN)                     | NBU1 | XOR Gate (partial)                                      |
| pBH401 | pCFXA_O1_nanoluc                                     | NBU2 | Reporter gene for off-diagonal testing                  |
| pBH402 | pCFXA_Otta_nanoluc                                   | NBU2 | Reporter gene for off-diagonal testing                  |
| pBH403 | pCFXA_Oagg_nanoluc                                   | NBU2 | Reporter gene for off-diagonal testing                  |
| pBH404 | pCFXA_Ottg_nanoluc                                   | NBU2 | Reporter gene for off-diagonal testing                  |
| pBH405 | pCFXA_Ogac_nanoluc                                   | NBU2 | Reporter gene for off-diagonal testing                  |
| pBH406 | LacI(YQR)                                            | NBU1 | Single TF for off-diagonal testing                      |
| pBH407 | LacI(TAN)                                            | NBU1 | Single TF for off-diagonal testing                      |
| pBH408 | LacI(KSL)                                            | NBU1 | Single TF for off-diagonal testing                      |
| pBH409 | LacI(HQN)                                            | NBU1 | Single TF for off-diagonal testing                      |
| pBH410 | LacI(GKR)                                            | NBU1 | Single TF for off-diagonal testing                      |
| pBH411 | IA(9)(YQR)                                           | NBU1 | Single TF for off-diagonal testing                      |
| pBH412 | IA(9)(TAN)                                           | NBU1 | Single TF for off-diagonal testing                      |
| pBH413 | IA(9)(KSL)                                           | NBU1 | Single TF for off-diagonal testing                      |
| pBH414 | IA(9)(HQN)                                           | NBU1 | Single TF for off-diagonal testing                      |
| pBH415 | IA(9)(GKR)                                           | NBU1 | Single TF for off-diagonal testing                      |
| pBH416 | RbsR(YQR)                                            | NBU1 | Single TF for off-diagonal testing                      |
| pBH417 | RbsR(TAN)                                            | NBU1 | Single TF for off-diagonal testing                      |
| pBH418 | RbsR(KSL)                                            | NBU1 | Single TF for off-diagonal testing                      |
| pBH419 | RbsR(HQN)                                            | NBU1 | Single TF for off-diagonal testing                      |
| pBH420 | RbsR(GKR)                                            | NBU1 | Single TF for off-diagonal testing                      |
| pBH421 | RA(1)(YQR)                                           | NBU1 | Single TF for off-diagonal testing                      |
| pBH422 | RA(1)(TAN)                                           | NBU1 | Single TF for off-diagonal testing                      |
| pBH423 | RA(1)(KSL)                                           | NBU1 | Single TF for off-diagonal testing                      |
| pBH424 | RA(1)(HQN)                                           | NBU1 | Single TF for off-diagonal testing                      |
| pBH425 | RA(1)(GKR)                                           | NBU1 | Single TF for off-diagonal testing                      |
| pBH501 | p1_dCas9                                             | NBU1 | Constitutive dCas9                                      |
| pBH502 | LacI(YQR)_pCFXA_O1CP_nano4sgRNA_pCFXA_nanoluc        | NBU2 | LacI-controlled sgRNA for nanoluc knockdown             |
| pBH503 | IA(9)(YQR)_pCFXA_O1CP_nano4sgRNA_pCFXA_nanoluc       | NBU2 | IA(9)-controlled sgRNA for nanoluc knockdown            |
| pBH504 | LacI(YQR)_pCFXA_O1CP_AmyC3sgRNA_p1_dCas9             | NBU1 | LacI-controlled sgRNA for Bt Amylopectin susC knockdown |
| pBH505 | RbsR(YQR)_pCFXA_O1CP_AmyC3sgRNA_p1_dCas9             | NBU1 | RbsR-controlled sgRNA for Bt Amylopectin susC knockdown |

|        |                                                                  |      |                                                    |
|--------|------------------------------------------------------------------|------|----------------------------------------------------|
| pBH506 | LacI(YQR)_pCFXA_O1CP_InuC4sgRNA_p1_dCas9                         | NBU1 | LacI-controlled sgRNA for Bo Inulin susC knockdown |
| pBH507 | RbsR(YQR)_pCFXA_O1CP_InuC4sgRNA_p1_dCas9                         | NBU1 | RbsR-controlled sgRNA for Bo Inulin susC knockdown |
| pBH508 | LacI(YQR)_pCFXA_O1CP_InuC6sgRNA_p1_dCas9                         | NBU1 | LacI-controlled sgRNA for Bu Inulin susC knockdown |
| pBH509 | RbsR(YQR)_pCFXA_O1CP_InuC6sgRNA_p1_dCas9                         | NBU1 | RbsR-controlled sgRNA for Bu Inulin susC knockdown |
| pBH510 | LacI(YQR)_RbsR(YQR)_pCFXA_O1CP_AmyC3sgRNA_p1_dCas9               | NBU2 | AND gate for Bt Amylopectin susC knockdown         |
| pBH511 | LacI(YQR)_RbsR(YQR)_pCFXA_O1CP_InuC6sgRNA_p1_dCas9               | NBU2 | AND gate for Bu Inulin susC knockdown              |
| pBH512 | IA(9)(YQR)_RA(1)(YQR)_pCFXA_O1CP_InuC4sgRNA_p1_dCas9             | NBU1 | NOR gate for Bo Inulin susC knockdown              |
| pBH513 | IA(9)(YQR)_pCFXA_O1CP_RbsR(HQN)_pCFXA_OttgCP_InuC4sgRNA_p1_dCas9 | NBU1 | OR gate for Bo Inulin susC knockdown               |

**Supplementary Table 2: Genetic parts used in this work.**

| Name       | Type | Sequence                                                                                                                                                                                                                                                                                                                                                                                                                                                                                                                                                                                                                                                                                                                                                                                                                                                                                                                                                                                                                                                                                                                                            |
|------------|------|-----------------------------------------------------------------------------------------------------------------------------------------------------------------------------------------------------------------------------------------------------------------------------------------------------------------------------------------------------------------------------------------------------------------------------------------------------------------------------------------------------------------------------------------------------------------------------------------------------------------------------------------------------------------------------------------------------------------------------------------------------------------------------------------------------------------------------------------------------------------------------------------------------------------------------------------------------------------------------------------------------------------------------------------------------------------------------------------------------------------------------------------------------|
| LacI(YQR)  | gene | gtgaaaccagtaacgttatacagatgtagcagagatgcccgggtctcttatcagaccgttcccgcgtggtgaaaccaggccagccagtttctcgaaaa<br>cgcgggaaaaaagtggaagcggcgatggcggagctgaatfacatcccaaccgcgtggcacaacaactggcgggcaaacagctgtgctgattggc<br>gttgccacctccagctgcccctgcaacgcgcctgcgcaaatgtcgcggcgattaaatctcgcgccgatcaactgggtgcccagcgtggtggtcagat<br>ggtagaacgaaagcggcgtcgaagcctgtaaacggcgggtgcacaatctctcgcgcaacgcgtcagtgggctgatcattaaactaccctggatgac<br>caggatgccaltgctggaagctgcctgcaactaatgtccggcgttattcttgatgctctgaccagacaccatcaaacgattatcttccatgaag<br>acggtacgcgactggcgtggagcatctgctgcattgggtcaccagcaaatcgcgctgttagcgggcccattaaagtctctcggcgcgtcgcgt<br>ctggctgctggcataaatatctcactgcgaatcaaatcagccgatagcggaaacgggaagggcactggagtgccatgcccgttttcaaaaacatg<br>caaatgctgaatgagggcatcttcccactgcgatctggtgccaacgatcagatggcgtcgggccaatgcccgcgcaattaccgagtcggcgtgc<br>gcgtgggtgaggatctcggtagtgggatacagcagataccgaagacagctcatgttatcccgcgttaaccacatcaaacaggtttccctgct<br>ggggcaaacagcgtggaccgttctgcaactctcagggccaaggcgtgaaaggcaatcagctgttgcctctcactggtgaaaaaaaaaac<br>caccctggcgccaatcgaaacccctctcccgcgctggccgattcattaatgcagctggcacgacaggtttccgactggaagcgggag<br>tga                                |
| RbsR(YQR)  | gene | gtgaaaccagtaacgttatacagatgtagcagagatgcccgggtctcttatcagaccgttcccgcgtggtgaaaccaggccagccagtttctcgaaaa<br>cgcgggaaaaaagtggaagcggcgatggcggagctcaatfacatcccaaccgcgtggcacaacaactggcgggcaaacgctgcatacattggc<br>atggtgatcactgccagtagcaatccttctattcagaactggtcgtggtgcaacgcagctgctcgaacgcgttatagctcgtcttggcaatacc<br>aaggcgtgaaacagcggatgaatgcgaatctgaaacgctgtagcaaaaacgcgtgtagctgctgctgactgaccgaaacgatcaaccttcg<br>cgtgaaatcagcaacgttatccgacagctcactgtagatgagactgggctcctcgtatggcgacagcgtatctattcaggataaactgctgctgg<br>gcggagacttagcaacgcaatctgtagcaaaagctcaccgctgattaccggcccgtggaataaacctcggcgcgctcgggtg<br>gaaggttatcggcggcgtgaaacgtcgggtctcaactctctgatggctatgaagcactggtgatttgaattaaacggcgggttgcgctatgc<br>gccaactgctacatccgctgctcctcagccgctttaccggaatgacgctatggcgttggcgtttaccggcgttatatcagcagagttaca<br>ggttccgagagatcgcggtgattgctatgacgatacgaactggcaagctttatgacgccaccattaaccatccaccaaccgaaagatgaact<br>gggggagctggcgattgtagtactcaatcagataaccagccgaccttcagcaaacagattacaactactccgattctgtaggaacgcggttc<br>ggcttagctggtgaaagaaaaaacccctggcgccaatcgaaacccctctcccgcgctggccgattcattaatgcagctggcacgacaggttccgactggaagcgggag<br>gttcccgactggaagcgggagctga            |
| IA(9)(YQR) | gene | gtgaaaccagtaacgttatacagatgtagcagagatgcccgggtctcttatcagaccgttcccgcgtggtgaaaccaggccagccagtttctcgaaaa<br>cgcgggaaaaaagtggaagcggcgatggcggagctcaatfacatcccaaccgcgtggcacaacaactggcgggcaaacgctgttctgattggc<br>gttgccacctccagctgcccctgcaacgcgcctgcgcaaatgtcgcggcgattaaatctcgcgctatcaactgggtgcccagcgtgctgctgtagg<br>tagaacgaaagcggcagcgaagcctgtaaacggcgggtgcacaatctctcgcgcaacgcgtcagtggtgatcattaaactaccgctgataaccag<br>gatgccattgctggaagctcctgcaactaatgttccggcgttattcttgatgctctgaccagacaccatcaaacgattatcttccatgaagagc<br>gtacgcgactggcgtggaagcctgctgcaatgggtcaccgcaaatcgcgctgtagcggcccattaaagtctctcggcgcgtcgtcgtctgg<br>ctggctgcaataatctcactgcgaatcaatcagccgatagcgggaagcggcactgagtgccatgcccgttttcaaaaacatgcaaa<br>atgctgaatgagggcagctgtccactgctgctggttccaacgatcagatggcgtggcgcaatgcgcccattaccgagacgggctcgcgcg<br>ttggtgagatctcggtagtgggatacagcagataccgaagacagctcatgttatcccgcgttaaccacatcaaacaggttttccctgctggtg<br>gcaaacagcgtggaccgttctgcaactctcagggccaaggcgtgaaaggcaatcagctgttgcctctcactggtgaaaaaaaaaaccc<br>ctggcgccaatcgaaacccctctcccgcgctggccgattcattaatgcagctggcacgacaggttcccgactggaagcgggagctga                                                         |
| RA(1)(YQR) | gene | gtgaaaccagtaacgttatacagatgtagcagagatgcccgggtctcttatcagaccgttcccgcgtggtgaaaccaggccagccagtttctcgaaaa<br>cgcgggaaaaaagtggaagcggcgatggcggagctcaatfacatcccaaccgcgtggcacaacaactggcgggcaaacgctgcatacattggc<br>atggtgatcactgccagtagcaatccttctattcagaactggtcgtggtgcaacgcagctgctcgaacgcgttatagctcgtcttggcaatacc<br>aaggcgtgaaacagcggatgaatgcgaatctgaaacgctgtagcaaaaacgcgtgtagctgctgctgactgaccgaaacgatcaaccttcg<br>cgtgaaatcagcaacgttatccgacagctcactgtagatgagactgggctcctcgtatggcgacagcgtatctattcaggataaactgctgctgg<br>gcggagacttagcaacgcaatctgtagcaaaagctcaccgctatcgcctgattaccggcccgtgataaaaactcggcgcgctcgggtg<br>gaaggttatcggcggcgtgaaacgtcgggtctcaactctctgatggctatgaagcactggtgatttgaattaaacggcgggttgcgctatgc<br>gccaactgctacatccgctgctcctcagccgcttaccggaatgacgctatggctgttggcgtttaccaggcgttatatcagcagagttaca<br>ggttccgagagatcgcggtgattgctatgacgatacgaactggcaagctttatgacgccaccattaaccatccaccaaccgaaagatgaact<br>gggggagctggcgattgtagtactcaatcagataaccagccgaccttcagcaaacagattacaactactccgattctgtaggaacgcggttc<br>ggcttagctggtgaaagaaaaaacccctggcgccaatcgaaacccctctcccgcgctggccgattcattaatgcagctggcacgacaggttccgactggaagcgggagctga<br>gttcccgactggaagcgggagctga |
| NanoLuc    | gene | atggttttactctggaagatttggcgtgagcagaccgggtataattggatcaagctcgtgaaacgggtggcgttaagctctctgtccag<br>aacctgggtgagcgtgacgccgattcagcgcctgcttccggcgagaacggctgcaaaatgatattcatgtgatccctgtacgaagccctg<br>agcgggtgaccaaattgggcaaatcagaaaatcttaaaagctgtaccagtgacatcaccactcaaggttatctgactacgctgctggtgatt<br>gatggtgtagcccgaaatgattgactattcggcgtcgtatgaaggcattccggtttttagcggtaaaaagatcaccgtaccggctaccctgtgaa<br>tggcaataagatttagcagcgtctgattaaccggagcggcagcctgctgttccgcgtgacctcaaacgggtgacgggttggcgtctgtagcagc<br>catctggcataa                                                                                                                                                                                                                                                                                                                                                                                                                                                                                                                                                                                                                                        |



|                         |                |                                                                                                                                                                                                                                                                                                                                                                                                                                                                                                                                                                                                                                                                                                                                                                                                                                                                                                                                                                                                                                                                                                                                                                                                                                                                                                                                                                                                                                                                                                                                                                                                                                                                                                                                                                                                                                                                                                                                                                                                                                                                                                                                                                                                                                                                                                                                                                                                                                                                                                                                                                                                                                                                                                                                                                                                                                                                                                                                                                                                                                                                                                                                                                                                                                                                                                                                                                                                                                                                                                                                                                                                                                                                                                                                                                                                                                                                                                                                                                                                                                                                                                             |
|-------------------------|----------------|-------------------------------------------------------------------------------------------------------------------------------------------------------------------------------------------------------------------------------------------------------------------------------------------------------------------------------------------------------------------------------------------------------------------------------------------------------------------------------------------------------------------------------------------------------------------------------------------------------------------------------------------------------------------------------------------------------------------------------------------------------------------------------------------------------------------------------------------------------------------------------------------------------------------------------------------------------------------------------------------------------------------------------------------------------------------------------------------------------------------------------------------------------------------------------------------------------------------------------------------------------------------------------------------------------------------------------------------------------------------------------------------------------------------------------------------------------------------------------------------------------------------------------------------------------------------------------------------------------------------------------------------------------------------------------------------------------------------------------------------------------------------------------------------------------------------------------------------------------------------------------------------------------------------------------------------------------------------------------------------------------------------------------------------------------------------------------------------------------------------------------------------------------------------------------------------------------------------------------------------------------------------------------------------------------------------------------------------------------------------------------------------------------------------------------------------------------------------------------------------------------------------------------------------------------------------------------------------------------------------------------------------------------------------------------------------------------------------------------------------------------------------------------------------------------------------------------------------------------------------------------------------------------------------------------------------------------------------------------------------------------------------------------------------------------------------------------------------------------------------------------------------------------------------------------------------------------------------------------------------------------------------------------------------------------------------------------------------------------------------------------------------------------------------------------------------------------------------------------------------------------------------------------------------------------------------------------------------------------------------------------------------------------------------------------------------------------------------------------------------------------------------------------------------------------------------------------------------------------------------------------------------------------------------------------------------------------------------------------------------------------------------------------------------------------------------------------------------------------------|
| dCas9                   | gene           | atggataa gaaactactcaataggcttagctatcggcacaaatagcgtcggatggggggtgactactgatgaatataaggttccgtcaaaaagtcaagg<br>ttctgggaaatacagaccgccagatc caaaaaactctataggggctctttttatgacagtgaggagagacagcggaaagcagctgctcaaacgga<br>cagctcgtagaaggatatacagctcggagaacgtatttttactacagggagattttcaaatgagatggcgaagtagatgatgtttctatcagct<br>gaagagctttttggggaagaagacaagaagcatgaacgtatcctatftttggaaatagtagatgaagttgcttcatgagaaatc caactatc<br>atcatctcgcaaaaaattggtagtctactgataaagcggalltgcgcttaactatfttggccttagcgcatafgaataagttctggctcattttgatga<br>gggagatttaactctgataatagtgatgggacaacatftatccagttggtaacaacctacaatcaatfttgaagaacccctattaacgcaagtg<br>agtagatgctaaagcgafttcttgcacgattgagtaaatcaagcaltagaataatcattgctcagctccccgggtagaagaaaaaaggctattgg<br>gaatcattgctttgctcattgggttgaccctaatfttaaatcaaatfttggattggcagaagatgctaaatfaccgctttcaaaagatacttacgatgatg<br>tagataatfttggcgcaaatggagatcaatagctgattgttttggcagctaaagaatftacagatgctatttcttcaagatcctaaagtaaaact<br>gaaataactaaggctcccctacagctcaatgattaaacgctacgatgaacatcaaacgactgactctttaaagcgtttatgctgacaacaactccag<br>aaaagtataaagaactcttttgcacatcaaaaacggatgacaggttattatgaggggagctgccaagaagaatftataatfttaacaaccaat<br>ttagaaaaaatggatggactgaggaattattgggaaactaaactgtgaaatftgctgcgcaaacgcaagcctttgacaacggctctatccccatc<br>aaatcacttgggtgagctgcatgctatttggagaagacaagaagactttatccattttaaagacaactgtgagaagatgaaaaaacttgcatttccga<br>atccttattatgttgcctcattggcgcgtggcaatagtcgtttgcatggatgactggaaagctggaagaacaattccccatgaafttgaagaagt<br>tcgataaaggcttctcagctcaatcatttgaacgcagacaactttgataaaactctcaaatgaaaaagtactaccaaaaacatagtttctttagag<br>tattttacggttataacgaattgacaaagctcaaatgtactgaaggaatgcgaaaccagcatttctcagtgaaacagaagaagcattgtgatt<br>taacttcaaaaacaactgaaaaagtaaccgttaagcaatataaagaagatttcaaaaaatagaagatttttgaatgagaaatftcaagagtgaaaga<br>tagattaatgctcattaggtactaccatgattgctaaaaatataaagataaagatttttgataatgaaagaatgagatacttagagataattgtt<br>taacattgacctatttgaagatagggagatgattgagaaagacttaaacatagctcactcttctgataaaggatgaaacagcttaaacgctcc<br>gttatactggttgggagcttctcgaaaatgataatggattagggataaagaactggcaaaacaatattagatttttgaatcagatggtttgcca<br>atcgaatfttgcagctgacatgatgatgattgacatttaagaagacattcaaaaagcacaagtgctggacaagggcagatggtttacatgaacata<br>ttgcaaatftgctgtagccctctattaaaaaggattttacagactgtaaaagtgtgatgaattggctcaagtaattggcgccataagccagaaa<br>atctgatttgaatggcagctgaaaaatcagacaactcaaaagggccagaaaaattcggagagcgtatgaaacgaatcgaagaaggtatcaaaaga<br>ataggaagctcagatcttaagagatcctgttgaataactcaatgcaaaatgaaagcctatcttattatcctcaaatggaagagacatgatgtg<br>gaccaagaatagataatactgfttaagtgattatgatgctcatttcccaaaagtfttcaaaagcagatcaatgacaataaaggcttaacgcg<br>ttctgataaaactgctgtaaacggataacgttccaagtgaagaagtgatcaaaaagatgaaaaacttcaagagcaacttcaaacgcaagttatca<br>ctaacgtgaattgataatfaacgaaagctgaacgtgggtggtgagtgaaactgataaagctggtttatcaaacgcaattggtgaaactcgcctaaat<br>cactaagcatgctggcaaaaatttggatagtcgcatgaatacctaaatagcgaatgataaactattcagagaggtaagtgattactttaaactaa<br>ttagtttgcactcgaaaaatftcaacttataaagctgagattaacaattaccatcatgccatgatgctgtatcaaatgctgctgttgaactgc<br>ttgattaagaataatccaaactgaaactcggagttgctctagtgattataaagttatgatgttcgtaaaatgattgctaaagctgagcaagaataggca<br>aagcaaccgcaaaaatttcttactaataatcagaaactctcaaacagaaatacactgcaaatggagagatcgcacaacgccccttaactgaaac<br>taatggggaactggagaatttctcgggataaaggcgagatttgcacagctgcaaaatgatttccatgcccaagctcaatgtaagaagaac<br>agaagtcagacagcggcaattcgaaggtcaatfttcaaaaagaatcggacaagcttattgctgtaaaaaagactgggacaaaaaata<br>tgggtgtttgataatccacgctgacttattcagctcctagtggtgctaaagtggaaaaaggaaactgaaaggttaaaactcgttaaaagatttag<br>ggatcacaattatgaaagaagtcttgaaaaaatcggattgacttttagaagctaaaggataaaggaafttaaaaaagacttaacttaaaactac<br>ctaaatagctctttgaggtgaaaacggtcgtaaacggatgctgcttagtccggagaattcaaaaaggaaatgagctggctcgcgaagcaata<br>tgtgaattttatatttagctagctattgaaaagtgaaaggtgtagcagaagatacaaaaaaacattgtttgtagcagcagcagcagcagcagcagc<br>atagctgaaacagcaaaaatattatcttattttagcgttattttagcagatgccaatttagataaagctttagtgatataaagctttagcagcagcagc<br>atactgaaacagcaaaaatattatcttattttagcgttattttagcagcagcagcagcagcagcagcagcagcagcagcagcagcagcagcagcagc<br>actctcaaaaaggatttagctcacttcatcactcaatcactgctctttagaaacagcattgattgagtcagctagaggtgactga |
| P <sub>cfxA</sub>       | promoter       | ttcaaaagaaaattcgacaactgttattttctatctatttgggtgggaaactttagttatgtacctttgtcggc                                                                                                                                                                                                                                                                                                                                                                                                                                                                                                                                                                                                                                                                                                                                                                                                                                                                                                                                                                                                                                                                                                                                                                                                                                                                                                                                                                                                                                                                                                                                                                                                                                                                                                                                                                                                                                                                                                                                                                                                                                                                                                                                                                                                                                                                                                                                                                                                                                                                                                                                                                                                                                                                                                                                                                                                                                                                                                                                                                                                                                                                                                                                                                                                                                                                                                                                                                                                                                                                                                                                                                                                                                                                                                                                                                                                                                                                                                                                                                                                                                  |
| P <sub>i</sub>          | promoter + RBS | gataaagtttggagaataaagctaaaagttctatttctcagctccgaaataaagacatataaaaagaaaagacac                                                                                                                                                                                                                                                                                                                                                                                                                                                                                                                                                                                                                                                                                                                                                                                                                                                                                                                                                                                                                                                                                                                                                                                                                                                                                                                                                                                                                                                                                                                                                                                                                                                                                                                                                                                                                                                                                                                                                                                                                                                                                                                                                                                                                                                                                                                                                                                                                                                                                                                                                                                                                                                                                                                                                                                                                                                                                                                                                                                                                                                                                                                                                                                                                                                                                                                                                                                                                                                                                                                                                                                                                                                                                                                                                                                                                                                                                                                                                                                                                                 |
| P <sub>BT1311</sub>     | promoter + RBS | tgatctggaagaagaatgaaagctgctgtaagctcgaatcaggtattgttctgacaggtgattccccatccgtaaacgcgatacttgcagttga<br>tctgactcaggaataaattataaataaggtgaagattgtgagataagctaatgaaatagaaaaaggatgccgtcacacaactgtcggcattcttttgg<br>ttttattagttgaaaatagtgaaaaagttgccaataatgatgtaacaaaatatttgcgttaacttgcactcacaactgttttaacatagggcacta                                                                                                                                                                                                                                                                                                                                                                                                                                                                                                                                                                                                                                                                                                                                                                                                                                                                                                                                                                                                                                                                                                                                                                                                                                                                                                                                                                                                                                                                                                                                                                                                                                                                                                                                                                                                                                                                                                                                                                                                                                                                                                                                                                                                                                                                                                                                                                                                                                                                                                                                                                                                                                                                                                                                                                                                                                                                                                                                                                                                                                                                                                                                                                                                                                                                                                                                                                                                                                                                                                                                                                                                                                                                                                                                                                                                    |
| P <sub>cfxA(O1)</sub>   | promoter       | tacaaagaaaattcgacaactgtattttctatctatttgaattgtgagcggataacaattacctttgctggcaattgtgagcggataacaatt                                                                                                                                                                                                                                                                                                                                                                                                                                                                                                                                                                                                                                                                                                                                                                                                                                                                                                                                                                                                                                                                                                                                                                                                                                                                                                                                                                                                                                                                                                                                                                                                                                                                                                                                                                                                                                                                                                                                                                                                                                                                                                                                                                                                                                                                                                                                                                                                                                                                                                                                                                                                                                                                                                                                                                                                                                                                                                                                                                                                                                                                                                                                                                                                                                                                                                                                                                                                                                                                                                                                                                                                                                                                                                                                                                                                                                                                                                                                                                                                               |
| P <sub>cfxA(Otta)</sub> | promoter       | tacaaagaaaattcgacaactgtattttctatctatttgaattttagcgcgttaaaattacctttgctggcaattttagcgcgttaaaatt                                                                                                                                                                                                                                                                                                                                                                                                                                                                                                                                                                                                                                                                                                                                                                                                                                                                                                                                                                                                                                                                                                                                                                                                                                                                                                                                                                                                                                                                                                                                                                                                                                                                                                                                                                                                                                                                                                                                                                                                                                                                                                                                                                                                                                                                                                                                                                                                                                                                                                                                                                                                                                                                                                                                                                                                                                                                                                                                                                                                                                                                                                                                                                                                                                                                                                                                                                                                                                                                                                                                                                                                                                                                                                                                                                                                                                                                                                                                                                                                                 |
| P <sub>cfxA(Ogac)</sub> | promoter       | tacaaagaaaattcgacaactgtattttctatctatttgaattgtgagcgcgtgcaattacctttgctggcaattgtgagcgcgtgcaatt                                                                                                                                                                                                                                                                                                                                                                                                                                                                                                                                                                                                                                                                                                                                                                                                                                                                                                                                                                                                                                                                                                                                                                                                                                                                                                                                                                                                                                                                                                                                                                                                                                                                                                                                                                                                                                                                                                                                                                                                                                                                                                                                                                                                                                                                                                                                                                                                                                                                                                                                                                                                                                                                                                                                                                                                                                                                                                                                                                                                                                                                                                                                                                                                                                                                                                                                                                                                                                                                                                                                                                                                                                                                                                                                                                                                                                                                                                                                                                                                                 |
| P <sub>cfxA(Ottg)</sub> | promoter       | tacaaagaaaattcgacaactgtattttctatctatttgaattttagcgcgtcaaaattacctttgctggcaattttagcgcgtcaaaatt                                                                                                                                                                                                                                                                                                                                                                                                                                                                                                                                                                                                                                                                                                                                                                                                                                                                                                                                                                                                                                                                                                                                                                                                                                                                                                                                                                                                                                                                                                                                                                                                                                                                                                                                                                                                                                                                                                                                                                                                                                                                                                                                                                                                                                                                                                                                                                                                                                                                                                                                                                                                                                                                                                                                                                                                                                                                                                                                                                                                                                                                                                                                                                                                                                                                                                                                                                                                                                                                                                                                                                                                                                                                                                                                                                                                                                                                                                                                                                                                                 |
| P <sub>cfxA(Oagg)</sub> | promoter       | tacaaagaaaattcgacaactgtattttctatctatttgaattgtgagcgcctcaattacctttgctggcaattgtgagcgcctcaatt                                                                                                                                                                                                                                                                                                                                                                                                                                                                                                                                                                                                                                                                                                                                                                                                                                                                                                                                                                                                                                                                                                                                                                                                                                                                                                                                                                                                                                                                                                                                                                                                                                                                                                                                                                                                                                                                                                                                                                                                                                                                                                                                                                                                                                                                                                                                                                                                                                                                                                                                                                                                                                                                                                                                                                                                                                                                                                                                                                                                                                                                                                                                                                                                                                                                                                                                                                                                                                                                                                                                                                                                                                                                                                                                                                                                                                                                                                                                                                                                                   |
| P <sub>cfxA(Osym)</sub> | promoter       | tacaaagaaaattcgacaactgtattttctatctatttgaattgtgagcgcctcaattacctttgctggcaattgtgagcgcctcaatt                                                                                                                                                                                                                                                                                                                                                                                                                                                                                                                                                                                                                                                                                                                                                                                                                                                                                                                                                                                                                                                                                                                                                                                                                                                                                                                                                                                                                                                                                                                                                                                                                                                                                                                                                                                                                                                                                                                                                                                                                                                                                                                                                                                                                                                                                                                                                                                                                                                                                                                                                                                                                                                                                                                                                                                                                                                                                                                                                                                                                                                                                                                                                                                                                                                                                                                                                                                                                                                                                                                                                                                                                                                                                                                                                                                                                                                                                                                                                                                                                   |
| nano4                   | sgRNA          | gacagaacgatcgctgaatttttagagctagaataagcaagftaaataaggctagctccgttatcaacttgaaaaagtgccaccgagtcggtgctttt<br>t                                                                                                                                                                                                                                                                                                                                                                                                                                                                                                                                                                                                                                                                                                                                                                                                                                                                                                                                                                                                                                                                                                                                                                                                                                                                                                                                                                                                                                                                                                                                                                                                                                                                                                                                                                                                                                                                                                                                                                                                                                                                                                                                                                                                                                                                                                                                                                                                                                                                                                                                                                                                                                                                                                                                                                                                                                                                                                                                                                                                                                                                                                                                                                                                                                                                                                                                                                                                                                                                                                                                                                                                                                                                                                                                                                                                                                                                                                                                                                                                     |
| BOinu4                  | sgRNA          | cctgacatcacattaccagtttttagagctagaataagcaagftaaataaggctagctccgttatcaacttgaaaaagtgccaccgagtcggtgctttt                                                                                                                                                                                                                                                                                                                                                                                                                                                                                                                                                                                                                                                                                                                                                                                                                                                                                                                                                                                                                                                                                                                                                                                                                                                                                                                                                                                                                                                                                                                                                                                                                                                                                                                                                                                                                                                                                                                                                                                                                                                                                                                                                                                                                                                                                                                                                                                                                                                                                                                                                                                                                                                                                                                                                                                                                                                                                                                                                                                                                                                                                                                                                                                                                                                                                                                                                                                                                                                                                                                                                                                                                                                                                                                                                                                                                                                                                                                                                                                                         |
| BUinu6                  | sgRNA          | gtcaactcaatgctaaagtgttttagagctagaataagcaagftaaataaggctagctccgttatcaacttgaaaaagtgccaccgagtcggtgctttt                                                                                                                                                                                                                                                                                                                                                                                                                                                                                                                                                                                                                                                                                                                                                                                                                                                                                                                                                                                                                                                                                                                                                                                                                                                                                                                                                                                                                                                                                                                                                                                                                                                                                                                                                                                                                                                                                                                                                                                                                                                                                                                                                                                                                                                                                                                                                                                                                                                                                                                                                                                                                                                                                                                                                                                                                                                                                                                                                                                                                                                                                                                                                                                                                                                                                                                                                                                                                                                                                                                                                                                                                                                                                                                                                                                                                                                                                                                                                                                                         |
| BTamy3                  | sgRNA          | acaacattggcaccgataacgttttagagctagaataagcaagftaaataaggctagctccgttatcaacttgaaaaagtgccaccgagtcggtgctttt                                                                                                                                                                                                                                                                                                                                                                                                                                                                                                                                                                                                                                                                                                                                                                                                                                                                                                                                                                                                                                                                                                                                                                                                                                                                                                                                                                                                                                                                                                                                                                                                                                                                                                                                                                                                                                                                                                                                                                                                                                                                                                                                                                                                                                                                                                                                                                                                                                                                                                                                                                                                                                                                                                                                                                                                                                                                                                                                                                                                                                                                                                                                                                                                                                                                                                                                                                                                                                                                                                                                                                                                                                                                                                                                                                                                                                                                                                                                                                                                        |

|              |              |                                                                    |
|--------------|--------------|--------------------------------------------------------------------|
| HH ribozyme  | 5' ribozyme  | nnnnnctgatgagtcctgaggacgaaacgagtaagctcgtc                          |
| HDV ribozyme | 3' ribozyme  | ggccggcatggtcccagcctcctcgtggcggcggctgggcaacatgcttggcatggcgaatgggac |
| nanoTerm     | terminator   | gcactctaactgttatcggagtcttttagattactaatcaaatgcttcta                 |
| L3S2P55      | terminator   | ctcggtagcaaaagacgaaCaataagacgctgaaaagcgtcttttcgftttggtcc           |
| L3S2P21      | terminator   | ctcggtagcaaaatccagaaaaggcctcccgaaggggggccttttcgftttggtcc           |
| TAN DBD      | partial gene | gtgaaaccagtaacgttatacagatgtcgcagagtatgccgggtctctaccgcgaccgtttccaac |
| GKR DBD      | partial gene | gtgaaaccagtaacgttatacagatgtcgcagagtatgccgggtctctggaaagaccgtttcccgc |
| HQN DBD      | partial gene | gtgaaaccagtaacgttatacagatgtcgcagagtatgccgggtctctcatcagaccgtttccaat |
| KSL DBD      | partial gene | gtgaaaccagtaacgttatacagatgtcgcagagtatgccgggtctctaaaagcaccgtttccctg |

- a. For the HH ribozyme, the first 6 bp are the reverse complement of the 6 bp directly downstream of the ribozyme.
- b. The DBD sequences include the first 22 residues of the gene, ending at the “R” of the “YQR” motif.

## Supplemental References

1. Rondon, R.E., Groseclose, T.M., Short, A.E. & Wilson, C.J. Transcriptional programming using engineered systems of transcription factors and genetic architectures. *Nat Commun* **10**, 4784 (2019).
2. Groseclose, T.M., Rondon, R.E., Herde, Z.D., Aldrete, C.A. & Wilson, C.J. Engineered systems of inducible anti-repressors for the next generation of biological programming. *Nat Commun* **11**, 4440 (2020).
3. Nielsen, A.A. *et al.* Genetic circuit design automation. *Science* **352**, aac7341 (2016).
4. Taketani, M. *et al.* Genetic circuit design automation for the gut resident species *Bacteroides thetaiotaomicron*. *Nat Biotechnol* **38**, 962-969 (2020).
5. Tamsir, A., Tabor, J.J. & Voigt, C.A. Robust multicellular computing using genetically encoded NOR gates and chemical 'wires'. *Nature* **469**, 212-5 (2011).
6. Groseclose, T.M., Hersey, A.N., Huang, B.D., Realf, M.J. & Wilson, C.J. Biological signal processing filters via engineering allosteric transcription factors. *Proc Natl Acad Sci U S A* **118**(2021).
